# Supplementary material for: Integrative Metabolomic and Transcriptomic Analysis Reveals the Mechanism of Specific Color Formation in Phoebe zhennan Heartwood
Source: Int J Mol Sci. 2022 Nov 5;23(21):13569. doi: 10.3390/ijms232113569 (PMC9658324; doi:10.3390/ijms232113569)
Supplement: Supplementary file 1 [file ijms-23-13569-s001.zip › Supplementary tables.xlsx]

## Sheet: Table S1
Table S1. Statistics of identified metabolites
Ion mode	All metabolites	Identified metabolites	Metabolites in KEGG	Metabolites in library
Positive	16762	489	489	377
Negative	18625	248	248	224
Total	35387	737	737	601
Ion mode indicates that the mode of MS analysis is mainly divided into a positive ion mode and a negative ion mode; All metabolites indicates the number of substances extracted by "XCMS" package in R; Identified metabolites indicates the amount of metabolites annotated by level-one and level-two MS data; Metabolites in library indicates the number of metabolites that could not only match that lev…

## Sheet: Table S2
Table S2. Significantly accumulated metatolites in heartwood of Phoebe zhennan
Metabolete name	Class	Super class	Content				Fold changes (HW vs. SW)
3,4-Dihydroxyphthalate	Benzene and substituted derivatives	Benzenoids	HW1	HW2	SW1	SW2
2-Pyrocatechuic acid	Benzene and substituted derivatives	Benzenoids	8.12135e+06	8.24164e+06	157129	138135	55.4181
5-Carboxyvanillic acid	Benzene and substituted derivatives	Benzenoids	9.30162e+07	93626494	4.13521e+06	3.95733e+06	23.0635
Aromadendrin	Benzene and substituted derivatives	Benzenoids	1.47197e+07	1.99769e+07	676118	278068	36.3626
Hippuric acid	Benzene and substituted derivatives	Benzenoids	2.76855e+07	2.26402e+07	2.69532e+06	1.62793e+06	11.6407
Protocatechuic acid	Benzene and substituted derivatives	Benzenoids	8.6777e+06	1.03949e+07	1.06862e+06	1.07005e+06	8.91793
Syringic acid	Benzene and substituted derivatives	Benzenoids	2.47077e+07	3.17674e+07	2.82079e+06	3.94872e+06	8.34256
Salicylic acid	Benzene and substituted derivatives	Benzenoids	2.67929e+07	2.60321e+07	3.0751e+06	1.18227e+06	12.4079
4-(beta-D-Glucosyloxy)benzoate	Benzene and substituted derivatives	Benzenoids	7.88466e+06	8.83569e+06	920417	1.4137e+06	7.16346
(R)-mandelic Acid	Benzene and substituted derivatives	Benzenoids	8.53166e+06	1.02471e+07	1.14131e+06	1.18934e+06	8.0573
Terephthalate	Benzene and substituted derivatives	Benzenoids	1.09046e+07	1.02672e+07	1.64545e+06	2.323e+06	5.33502
Amitriptyline	Dibenzocycloheptenes	Benzenoids	1.12981e+07	1.26162e+07	2.81004e+06	2.48572e+06	4.51573
2,6-Dimethyl-naphtalene	Naphthalenes	Benzenoids	1.80609e+07	8.05785e+06	761178	1.15277e+06	13.6465
Naltrexone	Phenanthrenes and derivatives	Benzenoids	2.38742e+07	2.53257e+07	890802	445241	36.8251
m-Cresol	Phenols	Benzenoids	2.8576e+08	3.99964e+08	1.61751e+07	2.21987e+07	17.8696
4-Methylcatechol	Phenols	Benzenoids	4.81364e+07	5.03103e+07	1.55447e+06	1.49181e+06	32.3171
Hydroquinone	Phenols	Benzenoids	4.36023e+06	9.61352e+06	206227	253666	30.3848
Normetanephrine	Phenols	Benzenoids	6.2699e+06	5.76491e+06	417829	866365	9.37149
Chavicol	Phenols	Benzenoids	7.93303e+07	1.03181e+08	1.3835e+07	9.25588e+06	7.90408
Gamma-terpinene	Unsaturated hydrocarbons	Hydrocarbons	1.69512e+07	1.56164e+07	4.71923e+06	2.48068e+06	4.52333
Linoleic acid	Fatty Acyls	Lipids and lipid-like molecules	6.28312e+08	6.38937e+08	1.21446e+07	1.50219e+07	46.6475
9(S)-HPODE	Fatty Acyls	Lipids and lipid-like molecules	2.92652e+11	1.03112e+11	2.42379e+07	6.25955e+07	4557.74
Prostaglandin F3a	Fatty Acyls	Lipids and lipid-like molecules	3.05176e+09	3.30336e+09	1.84303e+07	6.0666e+07	80.3467
Stearidonic acid	Fatty Acyls	Lipids and lipid-like molecules	3.49208e+06	3.9352e+06	49642	36524.1	86.1972
Myristic acid	Fatty Acyls	Lipids and lipid-like molecules	2.83717e+08	5.49826e+08	4.52743e+06	1.79317e+06	131.877
Atrazine	Fatty Acyls	Lipids and lipid-like molecules	2.99936e+07	3.38169e+07	626773	493129	56.9786
11-Dehydro-thromboxane B2	Fatty Acyls	Lipids and lipid-like molecules	7.7473e+06	9.39616e+06	229848	157339	44.277
Prostaglandin D1	Fatty Acyls	Lipids and lipid-like molecules	2.34811e+08	2.79087e+08	8.97327e+06	1.21075e+06	50.4612
(13E)-11a-Hydroxy-9,15-dioxoprost-13-enoic acid	Fatty Acyls	Lipids and lipid-like molecules	3.98361e+08	4.02126e+08	1.99116e+07	6.09722e+06	30.7775
13S-hydroxyoctadecadienoic acid	Fatty Acyls	Lipids and lipid-like molecules	8.28822e+06	1.17638e+07	781423	2.39775e+06	6.30729
Vomitoxin	Prenol lipids	Lipids and lipid-like molecules	3.46646e+07	4.76321e+07	8.72218e+06	7.27948e+06	5.14302
alpha-Cedrene	Prenol lipids	Lipids and lipid-like molecules	4.47483e+07	4.2978e+07	1.02601e+06	901564	45.5111
2-trans,6-trans-Farnesal	Prenol lipids	Lipids and lipid-like molecules	8.04299e+08	7.58863e+08	2.73852e+07	2.80554e+07	28.1953
Delta-Tocopherol	Prenol lipids	Lipids and lipid-like molecules	2.92377e+08	2.81823e+08	1.338e+07	1.24878e+07	22.1975
Geranial	Prenol lipids	Lipids and lipid-like molecules	1.06607e+07	1.28664e+07	617231	236329	27.5635
Menthyl pyrrolidone carboxylate	Prenol lipids	Lipids and lipid-like molecules	2.09343e+07	1.93637e+07	1.5178e+06	1.12636e+06	15.2404
beta-Caryophyllene	Prenol lipids	Lipids and lipid-like molecules	1.21591e+07	8.43632e+06	1.2399e+06	731395	10.4477
Pulegone	Prenol lipids	Lipids and lipid-like molecules	4.91439e+08	5.54103e+08	4.48789e+07	4.07041e+07	12.2167
alpha-Humulene	Prenol lipids	Lipids and lipid-like molecules	5.47208e+07	7.41875e+07	7.64696e+06	4.24617e+06	10.8389
17a-Estradiol	Steroids and steroid derivatives	Lipids and lipid-like molecules	2.66117e+08	3.48577e+08	3.93424e+07	7.05698e+07	5.59259
Nandrolone	Steroids and steroid derivatives	Lipids and lipid-like molecules	4.49796e+08	5.27807e+08	1.20459e+07	1.40456e+07	37.4683
S-Adenosylhomocysteine	5'-deoxyribonucleosides	Nucleosides, nucleotides, and analogues	1.3835e+07	1.17049e+07	1.34268e+06	832903	11.7393
1-Methyladenosine	Purine nucleosides	Nucleosides, nucleotides, and analogues	6.42755e+07	7.44026e+07	1.84252e+06	3.3458e+06	26.7289
Deoxycytidine	Pyrimidine nucleosides	Nucleosides, nucleotides, and analogues	1.27368e+07	1.07713e+07	614704	799839	16.6189
N6-Acetyl-L-lysine	Carboximidic acids and derivatives	Organic acids and derivatives	1.20713e+07	1.41184e+07	1.07318e+06	830804	13.7553
Quinapril	Carboxylic acids and derivatives	Organic acids and derivatives	1.68454e+08	1.38868e+08	1.00427e+07	1.05223e+07	14.944
Se-Methylselenocysteine	Carboxylic acids and derivatives	Organic acids and derivatives	1.70405e+08	1.55218e+08	970229	3.18064e+06	78.4471
5-Keto-D-gluconate	Carboxylic acids and derivatives	Organic acids and derivatives	5.1921e+08	6.65519e+08	1.3079e+07	1.44138e+07	43.0922
9,10,13-TriHOME	Carboxylic acids and derivatives	Organic acids and derivatives	9.62743e+06	9.38316e+06	281908	394669	28.0982
9,10-12,13-Diepoxyoctadecanoate	Carboxylic acids and derivatives	Organic acids and derivatives	2.03237e+07	1.6128e+07	680967	1.24367e+06	18.9395
gamma-Glutamyl-beta-aminopropiononitrile	Carboxylic acids and derivatives	Organic acids and derivatives	1.62742e+08	1.71734e+08	6.56779e+06	4.80191e+06	29.4182
Pyroglutamic acid	Carboxylic acids and derivatives	Organic acids and derivatives	7.92525e+06	8703424	548389	524827	15.4942
Glycylleucine	Carboxylic acids and derivatives	Organic acids and derivatives	9.3505e+07	6.02759e+07	7.44006e+06	7.55723e+06	10.2539
2-Amino-3-phosphonopropionic acid	Carboxylic acids and derivatives	Organic acids and derivatives	1.35086e+07	1.19053e+07	1.13774e+06	1.92688e+06	8.29268
gamma-Glutamylcysteine	Carboxylic acids and derivatives	Organic acids and derivatives	1.67095e+07	1.96725e+07	1.63017e+06	1.12119e+06	13.2233
Alpha-dimorphecolic acid	Carboxylic acids and derivatives	Organic acids and derivatives	3.45981e+06	4.51304e+06	347769	383104	10.9087
Farnesoic acid	Carboxylic acids and derivatives	Organic acids and derivatives	4.8021e+07	5.19275e+07	8.67907e+06	7.86423e+06	6.04163
N-Formyl-L-methionine	Carboxylic acids and derivatives	Organic acids and derivatives	4.07608e+08	3.85882e+08	7.84489e+07	4.8879e+07	6.23186
6-Hydroxyhexanoic acid	Hydroxy acids and derivatives	Organic acids and derivatives	7.83796e+07	1.07511e+08	2.08376e+07	1.82749e+07	4.75272
Phosphonoacetate	Organic phosphonic acids and derivatives	Organic acids and derivatives	5.99523e+06	5.90393e+06	90611.7	303927	30.1597
(1R,4R)-Dihydrocarvone	Organic oxides	Organic oxygen compounds	8.92634e+06	9.7075e+06	997779	1.46016e+06	7.58108
(1R,2S,4S)- Neoiso-dihydrocarveol	Organooxygen compounds	Organic oxygen compounds	1.2147e+07	9.68192e+06	1.81401e+06	1.58695e+06	6.41845
N-Acetylmannosamine	Organooxygen compounds	Organic oxygen compounds	1.76839e+07	1.2984e+07	170793	430331	51.0175
D-Xylitol	Organooxygen compounds	Organic oxygen compounds	1.18396e+10	8.77145e+09	2.07171e+08	4.32366e+08	32.2281
Gluconic acid	Organooxygen compounds	Organic oxygen compounds	2.66533e+07	2.19316e+07	534387	1.75555e+06	21.2167
Salicin	Organooxygen compounds	Organic oxygen compounds	7.37294e+07	8.24388e+07	2.50585e+06	3.22908e+06	27.231
Xanthoxylin	Organooxygen compounds	Organic oxygen compounds	2.68719e+06	2.61508e+06	147660	117186	20.0202
Gluconolactone	Organooxygen compounds	Organic oxygen compounds	1.34679e+07	1.25167e+07	839976	818572	15.6671
L-Fucose	Organooxygen compounds	Organic oxygen compounds	4.83797e+06	2.17625e+07	544672	341704	30.0104
D-Glycero-D-galacto-heptitol	Organooxygen compounds	Organic oxygen compounds	3.76846e+07	3.60945e+07	6.18888e+06	7.41926e+06	5.42169
Adenosine	Azacyclic compounds	Organoheterocyclic compounds	4.68698e+06	4.27801e+06	1.01436e+06	1.10498e+06	4.23008
Allantoin	Azoles	Organoheterocyclic compounds	9.18067e+06	8.09964e+06	204048	367739	30.2216
Phenytoin	Azolidines	Organoheterocyclic compounds	1.83119e+08	1.10525e+08	1.82738e+07	1.85592e+07	7.97229
Dalpanin	Benzopyrans	Organoheterocyclic compounds	4.14148e+06	3.69115e+06	234417	152240	20.2573
Leucodopachrome	Indoles and derivatives	Organoheterocyclic compounds	1.44355e+07	1.76034e+07	2.00382e+06	2.38273e+06	7.30388
5-Hydroxyindoleacetate	Indoles and derivatives	Organoheterocyclic compounds	2.66181e+07	2.37665e+07	2.30597e+06	2.01079e+06	11.6719
3-Hydroxypicolinic acid	Pyridines and derivatives	Organoheterocyclic compounds	5.59248e+07	7.09849e+07	9.68806e+06	5.9155e+06	8.13338
Nicotinic acid	Pyridines and derivatives	Organoheterocyclic compounds	1.16012e+08	1.61094e+08	3.43206e+06	5.32356e+06	31.6489
6-Hydroxynicotinic acid	Pyridines and derivatives	Organoheterocyclic compounds	7.4651e+06	9.74013e+06	268181	709743	17.5936
4-Pyridoxic acid	Pyridines and derivatives	Organoheterocyclic compounds	2.3399e+08	3.37669e+08	2.16469e+07	1.32032e+07	16.4033
Pyridoxamine	Pyridines and derivatives	Organoheterocyclic compounds	7.63608e+06	9.19075e+06	1.5491e+06	1.95206e+06	4.80606
Pyrrole-2-carboxylic acid	Pyrroles	Organoheterocyclic compounds	4.11257e+06	4.96731e+06	1.02592e+06	561270	5.72072
Xanthurenic acid	Quinolines and derivatives	Organoheterocyclic compounds	5.18901e+09	4.43189e+09	6.75419e+07	1.48929e+08	44.4443
3-(3,4-Dihydroxy-5-methoxy)-2-propenoic acid	Cinnamic acids and derivatives	Phenylpropanoids and polyketides	5.74478e+06	6.19286e+06	477770	437572	13.0417
4-Hydroxycinnamic acid	Cinnamic acids and derivatives	Phenylpropanoids and polyketides	4.33676e+06	3.07151e+06	39499	103675	51.743
m-Coumaric acid	Cinnamic acids and derivatives	Phenylpropanoids and polyketides	1.53638e+07	1.32804e+07	497925	410125	31.5447
Sinapic acid	Cinnamic acids and derivatives	Phenylpropanoids and polyketides	4.56616e+06	4.67025e+06	166428	123913	31.8124
trans-Ferulic acid	Cinnamic acids and derivatives	Phenylpropanoids and polyketides	2.85147e+07	1.84164e+07	1.22767e+06	1.18795e+06	19.4281
Isoferulic acid	Cinnamic acids and derivatives	Phenylpropanoids and polyketides	3.3552e+07	2.87223e+07	1.61965e+06	2.06947e+06	16.8805
Aesculetin	Coumarins and derivatives	Phenylpropanoids and polyketides	2.00499e+07	2.32571e+07	2.73206e+06	2.88181e+06	7.71426
Scopoletin	Coumarins and derivatives	Phenylpropanoids and polyketides	1.10112e+07	6.84143e+06	582672	844537	12.5088
4-Methylumbelliferone	Coumarins and derivatives	Phenylpropanoids and polyketides	2.28773e+07	2.48411e+07	1.24316e+06	1.23744e+06	19.2367
Herniarin	Coumarins and derivatives	Phenylpropanoids and polyketides	3.21564e+08	1.62825e+08	2.62482e+07	2.06099e+07	10.3373
Eriodictyol	Flavonoids	Phenylpropanoids and polyketides	1.53224e+08	3.04191e+08	1.36699e+07	1.46156e+07	16.1714
Luteolin	Flavonoids	Phenylpropanoids and polyketides	5.547e+07	3.42478e+07	1.08343e+06	1.53342e+06	34.2846
Isorhamnetin	Flavonoids	Phenylpropanoids and polyketides	3.73062e+07	3.18901e+07	1.49595e+06	1.01628e+06	27.5438
Naringenin	Flavonoids	Phenylpropanoids and polyketides	3.80237e+06	6.96028e+06	249552	225001	22.6796
Myricetin	Flavonoids	Phenylpropanoids and polyketides	5.36676e+07	3.46085e+07	3.72752e+06	3.80894e+06	11.7132
Sinensetin	Flavonoids	Phenylpropanoids and polyketides	7.54349e+06	8.38137e+06	551190	64269.9	25.8747
Genistein	Isoflavonoids	Phenylpropanoids and polyketides	1.39193e+07	2.08841e+07	4.12979e+06	1.5486e+06	6.1291
Equol	Isoflavonoids	Phenylpropanoids and polyketides	1.39685e+07	1.35661e+07	1.21379e+06	1.27182e+06	11.0777
Phloretin	Linear 1,3-diarylpropanoids	Phenylpropanoids and polyketides	3.85951e+06	3.8337e+06	770209	621781	5.52677
Hydrocinnamic acid	Phenylpropanoic acids	Phenylpropanoids and polyketides	4.37504e+07	4.99267e+07	1.94448e+06	1.30142e+06	28.8602
2'-Deoxyguanosine	Others	Others	1.51958e+07	2.30259e+07	810329	602854	27.0465
13(S)-HpOTrE	Others	Others	4.03458e+07	3.91325e+07	259839	480763	107.316
Taxifolin	Others	Others	3.36552e+08	3.81866e+08	2.37882e+06	6.5542e+06	80.4227
meso-2,6-Diaminoheptanedioate	Others	Others	1.19221e+09	6.67182e+08	1.06958e+07	6.70392e+07	23.9196
3-Ketosphingosine	Others	Others	4.72637e+06	6.40093e+06	55243.9	73785.7	86.2384
2-Amino-2-deoxy-D-gluconate	Others	Others	2.14084e+07	2.32991e+07	458157	825902	34.8173
Acetosyringone	Others	Others	2.49383e+07	2.8049e+07	755835	598409	39.1268
D-Glucuronic Acid	Others	Others	1.14585e+07	1.2815e+07	551979	218167	31.5179
(2S,4S)-4-Hydroxy-2,3,4,5-tetrahydrodipicolinate	Others	Others	1.45065e+08	1.39244e+08	7.96943e+06	1.2441e+07	13.9296
Caffeate	Others	Others	1.94867e+07	1.70601e+07	1.3495e+06	1.41704e+06	13.2103
Deoxyloganin	Others	Others	1.26307e+07	9.147e+06	917659	791012	12.7454
9(S)-HPOT	Others	Others	1.4036e+07	1.15751e+07	1.20847e+06	894524	12.1784
(2E,6E)-Farnesol	Others	Others	2.06172e+07	1.73619e+07	1.93832e+06	1.31493e+06	11.6742
2,3-Dinor-8-iso prostaglandin F2alpha	Others	Others	2.61159e+07	2.48442e+07	2.60564e+06	2.25075e+06	10.4934
4-Hydroxycinnamoylmethane	Others	Others	1.26934e+07	9.48493e+06	1.39164e+06	1.41841e+06	7.8925
Lariciresinol	Others	Others	7.63624e+07	7.15472e+07	8.13682e+06	4.62813e+06	11.5872
Isocorypalmine	Others	Others	6.48044e+07	4.55398e+07	8.63958e+06	6.31532e+06	7.37847
Gardenoside	Others	Others	3.12753e+07	2.39896e+07	4.16101e+06	2.2605e+06	8.6062
2,4,6_3,5-Pentahydroxycyclohexanone	Others	Others	1.09138e+08	9.5963e+07	1.80221e+07	1.6785e+07	5.89251
Dihydrodemethylsterigmatocystin	Others	Others	1.07686e+08	7.90472e+07	1.99689e+07	1.49451e+07	5.34837
(+)-6a-Hydroxymaackiain	Others	Others	3.35564e+07	4.52557e+07	7.34134e+06	4.4297e+06	6.69543
Trinexapac-ethyl	Pesticides/Herbicides	Others	3.22444e+07	4.32778e+07	1.07964e+07	1.03408e+07	3.57296
Isotretinoin	Therapeutics/Prescription Drugs; Endogenous Metabolites	Others	2.35181e+07	2.62439e+07	577144	363150	52.9218

## Sheet: Table S3
Table S3. Sequencing data and mapping statistics of total transcript
Samples	Clean reads	%>Q30	Mapping ratio	Uniq Mapping ratio	Multiple Mapping ratio	Reads Map to '+'	Reads Map to '-'
SW1-1	28988548	0.9358	0.8898	0.8545	0.0353	0.4707	0.4678
SW1-2	24111442	0.9416	0.8987	0.8632	0.0355	0.475	0.4717
SW1-3	24345558	0.9387	0.9038	0.8644	0.0393	0.4784	0.4759
SW1-4	26467673	0.9384	0.891	0.8586	0.0324	0.4671	0.4662
SW1-5	19906272	0.9342	0.8913	0.859	0.0323	0.4692	0.4674
SW1-6	19612511	0.9444	0.9075	0.8706	0.0369	0.4798	0.4772
SW2-1	24671504	0.9373	0.8915	0.858	0.0335	0.4703	0.4679
SW2-2	30164536	0.9305	0.871	0.8355	0.0355	0.4605	0.4596
SW2-3	20024628	0.934	0.8849	0.8541	0.0308	0.4637	0.4624
SW2-4	23301083	0.9435	0.8887	0.855	0.0337	0.4666	0.4646
SW2-5	23332968	0.9379	0.8901	0.8582	0.0319	0.4676	0.4654
SW2-6	23787964	0.9371	0.8994	0.8662	0.0332	0.4723	0.47
TZ-1	20890400	0.9318	0.8803	0.8445	0.0357	0.4646	0.4647
TZ-2	20945362	0.9441	0.8584	0.8261	0.0323	0.451	0.4497
TZ-3	19216877	0.9524	0.8908	0.8609	0.0299	0.4661	0.4631
TZ-4	22041926	0.9417	0.878	0.8501	0.0279	0.4573	0.4559
TZ-5	23782079	0.9351	0.8921	0.8615	0.0306	0.4679	0.4648
TZ-6	29377733	0.9418	0.8854	0.8543	0.0311	0.4637	0.4621

## Sheet: Table S4
Table S4. Total DEGs among three tissues
	Total DEGs	upregulated DEGs	downregulated DEGs
SW1 vs. SW2	521	200	321
TZ vs. SW1	3600	1805	1795
TZ vs. sw2	670	283	387

## Sheet: Table S5
Table S5. KEGG pathway enrichment analysis of DEGs between TZ and SW1
KEGG ID	Description	GeneRatio	Enrich factor	p value	q value	Gene ID	Regulated
ko04075	Plant hormone signal transduction	132/1245	1.51	4.82553e-07	5.53666e-05	Maker00000934.gene/Maker00001262.gene/Maker00001535.gene/Maker00001823.gene/Maker00002419.gene/Maker00002825.gene/Maker00003213.gene/Maker00003879.gene/Maker00003884.gene/Maker00004834.gene/Maker00004974.gene/Maker00005392.gene/Maker00005797.gene/Maker00005867.gene/Maker00006087.gene/Maker00006238.gene/Maker00007630.gene/Maker00009472.gene/Maker00010138.gene/Maker00010399.gene/Maker00010556.gene/…	up&down
ko04626	Plant-pathogen interaction	109/1245	0.85	0.978886	0.903439	Maker00000431.gene/Maker00000578.gene/Maker00000780.gene/Maker00001215.gene/Maker00001420.gene/Maker00001465.gene/Maker00001791.gene/Maker00002106.gene/Maker00002208.gene/Maker00002592.gene/Maker00002777.gene/Maker00003832.gene/Maker00004273.gene/Maker00004974.gene/Maker00006351.gene/Maker00009035.gene/Maker00011928.gene/Maker00012227.gene/Maker00014965.gene/Maker00015513.gene/Maker00015601.gene/…	up&down
ko04016	MAPK signaling pathway - plant	80/1245	1.34	0.00340292	0.0526578	Maker00000780.gene/Maker00001465.gene/Maker00001762.gene/Maker00002106.gene/Maker00004273.gene/Maker00004974.gene/Maker00005797.gene/Maker00010138.gene/Maker00010556.gene/Maker00013172.gene/Maker00013341.gene/Maker00014965.gene/Maker00015701.gene/Maker00018016.gene/Maker00018812.gene/Maker00021384.gene/Maker00021490.gene/Maker00021721.gene/Maker00022911.gene/Maker00023278.gene/Maker00024104.gene/…	up&down
ko00500	Starch and sucrose metabolism	72/1245	1.67	6.37769e-06	0.000365878	Maker00002483.gene/Maker00002634.gene/Maker00003840.gene/Maker00005385.gene/Maker00005523.gene/Maker00007253.gene/Maker00008203.gene/Maker00008701.gene/Maker00009766.gene/Maker00009773.gene/Maker00010341.gene/Maker00012772.gene/Maker00013857.gene/Maker00013891.gene/Maker00014267.gene/Maker00014503.gene/Maker00014599.gene/Maker00016053.gene/Maker00016242.gene/Maker00018055.gene/Maker00019102.gene/…	up&down
ko01200	Carbon metabolism	65/1245	1.26	0.029661	0.206178	Maker00001273.gene/Maker00001684.gene/Maker00003252.gene/Maker00005180.gene/Maker00008262.gene/Maker00008928.gene/Maker00009766.gene/Maker00009773.gene/Maker00010807.gene/Maker00011481.gene/Maker00013709.gene/Maker00018021.gene/Maker00020102.gene/Maker00020116.gene/Maker00020569.gene/Maker00020691.gene/Maker00021313.gene/Maker00021381.gene/Maker00021986.gene/Maker00024577.gene/Maker00024712.gene/…	up&down
ko00010	Glycolysis / Gluconeogenesis	47/1245	1.8	3.77155e-05	0.00144245	Maker00001273.gene/Maker00002453.gene/Maker00007858.gene/Maker00008262.gene/Maker00008594.gene/Maker00009766.gene/Maker00009773.gene/Maker00013709.gene/Maker00018055.gene/Maker00018242.gene/Maker00020569.gene/Maker00021313.gene/Maker00021381.gene/Maker00021986.gene/Maker00023635.gene/Maker00024751.gene/Maker00026101.gene/Maker00027089.gene/Maker00027458.gene/Maker00028235.gene/Maker00029589.gene/…	up&down
ko01230	Biosynthesis of amino acids	47/1245	1.08	0.297621	0.752589	Maker00001342.gene/Maker00003905.gene/Maker00006889.gene/Maker00007501.gene/Maker00008262.gene/Maker00008928.gene/Maker00013709.gene/Maker00020569.gene/Maker00021313.gene/Maker00021381.gene/Maker00021986.gene/Maker00024577.gene/Maker00024712.gene/Maker00025643.gene/Maker00026101.gene/Maker00027894.gene/Maker00028235.gene/Maker00029589.gene/Maker00031152.gene/Maker00031514.gene/Maker00031523.gene/…	up&down
ko04141	Protein processing in endoplasmic reticulum	46/1245	0.96	0.63777	0.903439	Maker00002574.gene/Maker00003737.gene/Maker00005049.gene/Maker00005088.gene/Maker00006881.gene/Maker00010847.gene/Maker00012704.gene/Maker00019176.gene/Maker00019688.gene/Maker00021331.gene/Maker00023301.gene/Maker00023317.gene/Maker00023561.gene/Maker00024136.gene/Maker00024662.gene/Maker00025912.gene/Maker00026010.gene/Maker00029819.gene/Maker00029896.gene/Maker00030185.gene/Maker00030402.gene/…	up&down
ko04144	Endocytosis	42/1245	0.86	0.880218	0.903439	Maker00000448.gene/Maker00003166.gene/Maker00009865.gene/Maker00010240.gene/Maker00015717.gene/Maker00017165.gene/Maker00018067.gene/Maker00019851.gene/Maker00020403.gene/Maker00020601.gene/Maker00020695.gene/Maker00021082.gene/Maker00024261.gene/Maker00026010.gene/Maker00027369.gene/Maker00029896.gene/Maker00030052.gene/Maker00031313.gene/Maker00035187.gene/Maker00035356.gene/Maker00036820.gene/…	up&down
ko00520	Amino sugar and nucleotide sugar metabolism	37/1245	1.08	0.333165	0.752589	Maker00004864.gene/Maker00008838.gene/Maker00009766.gene/Maker00009773.gene/Maker00011450.gene/Maker00012962.gene/Maker00016243.gene/Maker00018055.gene/Maker00020614.gene/Maker00021774.gene/Maker00022205.gene/Maker00024474.gene/Maker00026785.gene/Maker00027542.gene/Maker00029887.gene/Maker00031233.gene/Maker00033696.gene/Maker00033713.gene/Maker00039343.gene/Maker00040611.gene/Maker00043695.gene/…	up&down
ko00230	Purine metabolism	35/1245	1.47	0.0116164	0.111069	Maker00002161.gene/Maker00002404.gene/Maker00002483.gene/Maker00009695.gene/Maker00009732.gene/Maker00011012.gene/Maker00013391.gene/Maker00013709.gene/Maker00018055.gene/Maker00023073.gene/Maker00023537.gene/Maker00026101.gene/Maker00027927.gene/Maker00028176.gene/Maker00031120.gene/Maker00031283.gene/Maker00033438.gene/Maker00033696.gene/Maker00033713.gene/Maker00037664.gene/Maker00038982.gene/…	up&down
ko03013	RNA transport	35/1245	0.83	0.89908	0.903439	Maker00000904.gene/Maker00002565.gene/Maker00003191.gene/Maker00010214.gene/Maker00010301.gene/Maker00012648.gene/Maker00013449.gene/Maker00015674.gene/Maker00016069.gene/Maker00017494.gene/Maker00017935.gene/Maker00018366.gene/Maker00019047.gene/Maker00019067.gene/Maker00019345.gene/Maker00022136.gene/Maker00024260.gene/Maker00026750.gene/Maker00027578.gene/Maker00029565.gene/Maker00029573.gene/…	up&down
ko04120	Ubiquitin mediated proteolysis	34/1245	1.04	0.424371	0.885292	Maker00004961.gene/Maker00005049.gene/Maker00005052.gene/Maker00009081.gene/Maker00010227.gene/Maker00015581.gene/Maker00020484.gene/Maker00023301.gene/Maker00024193.gene/Maker00025184.gene/Maker00028465.gene/Maker00030055.gene/Maker00030185.gene/Maker00035342.gene/Maker00038059.gene/Maker00038083.gene/Maker00038628.gene/Maker00039508.gene/Maker00040704.gene/Maker00041353.gene/Maker00043953.gene/…	up&down
ko00052	Galactose metabolism	32/1245	1.69	0.0018349	0.0350885	Maker00002400.gene/Maker00002634.gene/Maker00007554.gene/Maker00008262.gene/Maker00011532.gene/Maker00015852.gene/Maker00018055.gene/Maker00020614.gene/Maker00021986.gene/Maker00022213.gene/Maker00026923.gene/Maker00028764.gene/Maker00028788.gene/Maker00029611.gene/Maker00029887.gene/Maker00030265.gene/Maker00033696.gene/Maker00033713.gene/Maker00035827.gene/Maker00041540.gene/Maker00043814.gene/…	up&down
ko03018	RNA degradation	32/1245	1.15	0.226816	0.684846	Maker00001778.gene/Maker00002565.gene/Maker00003643.gene/Maker00004980.gene/Maker00008262.gene/Maker00010872.gene/Maker00011405.gene/Maker00013816.gene/Maker00020569.gene/Maker00021047.gene/Maker00021986.gene/Maker00026075.gene/Maker00027466.gene/Maker00028631.gene/Maker00029694.gene/Maker00031500.gene/Maker00032557.gene/Maker00035372.gene/Maker00035469.gene/Maker00035620.gene/Maker00036635.gene/…	up&down
ko00561	Glycerolipid metabolism	30/1245	1.58	0.00731071	0.0838807	Maker00002453.gene/Maker00004934.gene/Maker00005634.gene/Maker00023606.gene/Maker00024705.gene/Maker00027089.gene/Maker00028379.gene/Maker00029551.gene/Maker00031386.gene/Maker00032058.gene/Maker00033428.gene/Maker00033473.gene/Maker00037311.gene/Maker00041052.gene/Maker00043737.gene/Maker00046357.gene/Maker00048462.gene/Maker00048904.gene/Maker00049112.gene/Maker00049250.gene/Maker00053024.gene/…	up&down
ko03040	Spliceosome	30/1245	0.62	0.999024	0.903439	Maker00006795.gene/Maker00006885.gene/Maker00009531.gene/Maker00009559.gene/Maker00010561.gene/Maker00014111.gene/Maker00016025.gene/Maker00017827.gene/Maker00018366.gene/Maker00021362.gene/Maker00021374.gene/Maker00022460.gene/Maker00024411.gene/Maker00026010.gene/Maker00027915.gene/Maker00029896.gene/Maker00030322.gene/Maker00031313.gene/Maker00033715.gene/Maker00034025.gene/Maker00036148.gene/…	up&down
ko00940	Phenylpropanoid biosynthesis	28/1245	0.86	0.827066	0.903439	Maker00002157.gene/Maker00008006.gene/Maker00008701.gene/Maker00009744.gene/Maker00012757.gene/Maker00014599.gene/Maker00014940.gene/Maker00028272.gene/Maker00029283.gene/Maker00029676.gene/Maker00031517.gene/Maker00031567.gene/Maker00035304.gene/Maker00039451.gene/Maker00042151.gene/Maker00043745.gene/Maker00051385.gene/Maker00053487.gene/Maker00056326.gene/Phoebe_bournei_newGene_11668/Phoebe_bo…	up&down
ko00030	Pentose phosphate pathway	25/1245	1.96	0.000655451	0.0150409	Maker00005180.gene/Maker00007858.gene/Maker00008262.gene/Maker00008594.gene/Maker00009766.gene/Maker00009773.gene/Maker00010807.gene/Maker00018055.gene/Maker00018242.gene/Maker00021313.gene/Maker00021986.gene/Maker00023635.gene/Maker00026650.gene/Maker00026662.gene/Maker00033004.gene/Maker00033696.gene/Maker00033713.gene/Maker00037191.gene/Maker00043814.gene/Maker00045437.gene/Maker00047125.gene/…	up&down
ko00480	Glutathione metabolism	25/1245	1.31	0.0921431	0.459661	Maker00005180.gene/Maker00006259.gene/Maker00011012.gene/Maker00015499.gene/Maker00017791.gene/Maker00023554.gene/Maker00024188.gene/Maker00033004.gene/Maker00036689.gene/Maker00037822.gene/Maker00040607.gene/Maker00047125.gene/Maker00051350.gene/Maker00051822.gene/Maker00054779.gene/Phoebe_bournei_newGene_13141/Phoebe_bournei_newGene_14175/Phoebe_bournei_newGene_17058/Phoebe_bournei_newGene_3248…	up&down
ko03010	Ribosome	25/1245	0.46	1	0.903439	Maker00001402.gene/Maker00004582.gene/Maker00005920.gene/Maker00013957.gene/Maker00014972.gene/Maker00015042.gene/Maker00023677.gene/Maker00024264.gene/Maker00028465.gene/Maker00031119.gene/Maker00031361.gene/Maker00034371.gene/Maker00035358.gene/Maker00035390.gene/Maker00042680.gene/Maker00043795.gene/Maker00043943.gene/Maker00048582.gene/Maker00050575.gene/Maker00053121.gene/Phoebe_bournei_newG…	up&down
ko00051	Fructose and mannose metabolism	24/1245	1.77	0.00367156	0.0526578	Maker00007858.gene/Maker00008262.gene/Maker00008594.gene/Maker00012432.gene/Maker00018242.gene/Maker00021313.gene/Maker00021774.gene/Maker00021986.gene/Maker00023635.gene/Maker00028235.gene/Maker00034755.gene/Maker00037191.gene/Maker00039343.gene/Maker00043695.gene/Maker00043814.gene/Maker00044616.gene/Maker00049241.gene/Maker00051869.gene/Maker00054745.gene/Maker00055095.gene/Phoebe_bournei_newG…	up&down
ko02010	ABC transporters	24/1245	1.2	0.195503	0.672097	Maker00007887.gene/Maker00008768.gene/Maker00011921.gene/Maker00013101.gene/Maker00014887.gene/Maker00017458.gene/Maker00025794.gene/Maker00026139.gene/Maker00027146.gene/Maker00028203.gene/Maker00036286.gene/Maker00036309.gene/Maker00036327.gene/Maker00036356.gene/Maker00039526.gene/Maker00040864.gene/Maker00041080.gene/Maker00047596.gene/Maker00048898.gene/Maker00051085.gene/Maker00056187.gene/…	up&down
ko00564	Glycerophospholipid metabolism	23/1245	1.04	0.462624	0.891043	Maker00000428.gene/Maker00002020.gene/Maker00002198.gene/Maker00004934.gene/Maker00010252.gene/Maker00015060.gene/Maker00024705.gene/Maker00025089.gene/Maker00031386.gene/Maker00032058.gene/Maker00035669.gene/Maker00037268.gene/Maker00040957.gene/Maker00041352.gene/Maker00043771.gene/Maker00045874.gene/Maker00048904.gene/Maker00049112.gene/Maker00049250.gene/Phoebe_bournei_newGene_1042/Phoebe_bou…	up&down
ko00562	Inositol phosphate metabolism	23/1245	1.01	0.516034	0.891043	Maker00002020.gene/Maker00011985.gene/Maker00020403.gene/Maker00020762.gene/Maker00025593.gene/Maker00025814.gene/Maker00027435.gene/Maker00028235.gene/Maker00028331.gene/Maker00031093.gene/Maker00031395.gene/Maker00037268.gene/Maker00043648.gene/Maker00048098.gene/Maker00052590.gene/Maker00054745.gene/Maker00054749.gene/Maker00054790.gene/Maker00055160.gene/Phoebe_bournei_newGene_1060/Phoebe_bou…	up&down
ko00190	Oxidative phosphorylation	23/1245	0.61	0.997857	0.903439	Maker00002197.gene/Maker00002623.gene/Maker00004586.gene/Maker00005260.gene/Maker00008488.gene/Maker00008535.gene/Maker00008540.gene/Maker00010218.gene/Maker00010978.gene/Maker00012109.gene/Maker00026743.gene/Maker00027267.gene/Maker00027534.gene/Maker00033601.gene/Maker00035429.gene/Maker00036304.gene/Maker00038499.gene/Maker00047250.gene/Maker00050647.gene/Maker00050649.gene/Maker00051299.gene/…	up&down
ko00040	Pentose and glucuronate interconversions	22/1245	0.84	0.845681	0.903439	Maker00000957.gene/Maker00002453.gene/Maker00008400.gene/Maker00012962.gene/Maker00014269.gene/Maker00027089.gene/Maker00027542.gene/Maker00029444.gene/Maker00029887.gene/Maker00035833.gene/Maker00037311.gene/Maker00037854.gene/Maker00040139.gene/Maker00042934.gene/Maker00043751.gene/Maker00044991.gene/Maker00046435.gene/Maker00053877.gene/Maker00055498.gene/Maker00056529.gene/Phoebe_bournei_newG…	up&down
ko00620	Pyruvate metabolism	21/1245	1.16	0.264008	0.721225	Maker00001273.gene/Maker00008901.gene/Maker00013709.gene/Maker00018021.gene/Maker00019142.gene/Maker00020116.gene/Maker00025758.gene/Maker00026101.gene/Maker00029691.gene/Maker00032618.gene/Maker00033473.gene/Maker00033568.gene/Maker00037620.gene/Maker00045412.gene/Maker00048462.gene/Maker00053087.gene/Maker00055529.gene/Maker00056471.gene/Phoebe_bournei_newGene_11846/Phoebe_bournei_newGene_18074…	up&down
ko03008	Ribosome biogenesis in eukaryotes	21/1245	1.02	0.49368	0.891043	Maker00002269.gene/Maker00003191.gene/Maker00013875.gene/Maker00026741.gene/Maker00028135.gene/Maker00028259.gene/Maker00028318.gene/Maker00032728.gene/Maker00037079.gene/Maker00037112.gene/Maker00041284.gene/Maker00042076.gene/Maker00044517.gene/Maker00044550.gene/Maker00053040.gene/Phoebe_bournei_newGene_10366/Phoebe_bournei_newGene_11422/Phoebe_bournei_newGene_11650/Phoebe_bournei_newGene_1762…	up&down
ko03015	mRNA surveillance pathway	21/1245	0.85	0.810167	0.903439	Maker00000904.gene/Maker00001968.gene/Maker00002565.gene/Maker00002605.gene/Maker00004952.gene/Maker00014658.gene/Maker00018366.gene/Maker00020027.gene/Maker00020051.gene/Maker00020155.gene/Maker00020215.gene/Maker00029196.gene/Maker00033715.gene/Maker00037870.gene/Maker00038190.gene/Maker00044571.gene/Maker00045341.gene/Maker00051894.gene/Maker00052601.gene/Maker00053855.gene/Phoebe_bournei_newG…	up&down
ko00270	Cysteine and methionine metabolism	20/1245	0.99	0.555201	0.897212	Maker00007383.gene/Maker00015426.gene/Maker00018021.gene/Maker00019530.gene/Maker00020116.gene/Maker00024712.gene/Maker00025643.gene/Maker00026087.gene/Maker00030190.gene/Maker00031360.gene/Maker00032926.gene/Maker00033507.gene/Maker00035528.gene/Maker00035684.gene/Maker00036502.gene/Maker00038202.gene/Maker00049859.gene/Maker00049864.gene/Maker00053067.gene/Phoebe_bournei_newGene_10166	up&down
ko00630	Glyoxylate and dicarboxylate metabolism	18/1245	0.94	0.646581	0.903439	Maker00001273.gene/Maker00003252.gene/Maker00003905.gene/Maker00008928.gene/Maker00018021.gene/Maker00020116.gene/Maker00024577.gene/Maker00029691.gene/Maker00030663.gene/Maker00036767.gene/Maker00039768.gene/Maker00041052.gene/Maker00042378.gene/Maker00043663.gene/Maker00046357.gene/Maker00052627.gene/Maker00055967.gene/Phoebe_bournei_newGene_7047	up&down
ko00260	Glycine, serine and threonine metabolism	17/1245	1.45	0.0716177	0.373509	Maker00003252.gene/Maker00006889.gene/Maker00020507.gene/Maker00020626.gene/Maker00024577.gene/Maker00024712.gene/Maker00029589.gene/Maker00033473.gene/Maker00035528.gene/Maker00041052.gene/Maker00042378.gene/Maker00046357.gene/Maker00047564.gene/Maker00048966.gene/Maker00052627.gene/Phoebe_bournei_newGene_13170/Phoebe_bournei_newGene_14997	up&down
ko04712	Circadian rhythm - plant	17/1245	1.31	0.149201	0.601153	Maker00003862.gene/Maker00004297.gene/Maker00007910.gene/Maker00008419.gene/Maker00012645.gene/Maker00019509.gene/Maker00025497.gene/Maker00025976.gene/Maker00026122.gene/Maker00026804.gene/Maker00036741.gene/Maker00037079.gene/Maker00037112.gene/Maker00040732.gene/Maker00049375.gene/Maker00049392.gene/Maker00053040.gene	up&down
ko04070	Phosphatidylinositol signaling system	17/1245	0.83	0.824495	0.903439	Maker00011985.gene/Maker00020403.gene/Maker00020762.gene/Maker00024705.gene/Maker00027435.gene/Maker00031093.gene/Maker00031395.gene/Maker00043648.gene/Maker00048098.gene/Maker00052590.gene/Maker00054749.gene/Maker00054790.gene/Maker00055160.gene/Phoebe_bournei_newGene_1060/Phoebe_bournei_newGene_15275/Phoebe_bournei_newGene_7686/Phoebe_bournei_newGene_9423	up&down
ko00310	Lysine degradation	16/1245	1.86	0.0100076	0.104386	Maker00011481.gene/Maker00013670.gene/Maker00015370.gene/Maker00020939.gene/Maker00024896.gene/Maker00029691.gene/Maker00033473.gene/Maker00037409.gene/Maker00048020.gene/Maker00048462.gene/Maker00055823.gene/Phoebe_bournei_newGene_18074/Phoebe_bournei_newGene_25/Phoebe_bournei_newGene_2699/Phoebe_bournei_newGene_3989/Phoebe_bournei_newGene_6866	up&down
ko00510	N-Glycan biosynthesis	16/1245	1.67	0.0259845	0.206178	Maker00004909.gene/Maker00004947.gene/Maker00005496.gene/Maker00006881.gene/Maker00007497.gene/Maker00009141.gene/Maker00019688.gene/Maker00020615.gene/Maker00023317.gene/Maker00023561.gene/Maker00043415.gene/Maker00046235.gene/Maker00046891.gene/Maker00047366.gene/Phoebe_bournei_newGene_17605/Phoebe_bournei_newGene_8930	up&down
ko00900	Terpenoid backbone biosynthesis	16/1245	1.57	0.042819	0.27294	Maker00015627.gene/Maker00015702.gene/Maker00017964.gene/Maker00018190.gene/Maker00027314.gene/Maker00029288.gene/Maker00029691.gene/Maker00034090.gene/Maker00036915.gene/Maker00037935.gene/Maker00043925.gene/Maker00045458.gene/Maker00046266.gene/Maker00051408.gene/Maker00056543.gene/Phoebe_bournei_newGene_13970	up&down
ko00511	Other glycan degradation	16/1245	1.49	0.0662788	0.373509	Maker00002400.gene/Maker00003227.gene/Maker00007554.gene/Maker00020521.gene/Maker00029611.gene/Maker00030265.gene/Maker00032273.gene/Maker00034847.gene/Maker00037630.gene/Maker00041540.gene/Maker00044076.gene/Maker00044718.gene/Maker00052500.gene/Maker00052617.gene/Maker00055284.gene/Phoebe_bournei_newGene_2859	up&down
ko00380	Tryptophan metabolism	16/1245	1.15	0.317228	0.752589	Maker00011481.gene/Maker00028343.gene/Maker00028418.gene/Maker00028455.gene/Maker00029691.gene/Maker00033473.gene/Maker00034436.gene/Maker00044610.gene/Maker00048462.gene/Maker00055823.gene/Phoebe_bournei_newGene_18074/Phoebe_bournei_newGene_1925/Phoebe_bournei_newGene_3363/Phoebe_bournei_newGene_3370/Phoebe_bournei_newGene_3989/Phoebe_bournei_newGene_6866	up&down
ko00906	Carotenoid biosynthesis	15/1245	1.84	0.0133646	0.117954	Maker00010184.gene/Maker00015551.gene/Maker00025222.gene/Maker00025807.gene/Maker00026031.gene/Maker00026779.gene/Maker00027381.gene/Maker00028105.gene/Maker00029822.gene/Maker00031262.gene/Maker00044878.gene/Maker00052979.gene/Maker00054988.gene/Phoebe_bournei_newGene_15785/Phoebe_bournei_newGene_16740	up&down
ko00710	Carbon fixation in photosynthetic organisms	15/1245	1.02	0.502719	0.891043	Maker00018021.gene/Maker00020116.gene/Maker00021313.gene/Maker00021381.gene/Maker00028235.gene/Maker00032618.gene/Maker00035378.gene/Maker00037191.gene/Maker00037620.gene/Maker00054745.gene/Phoebe_bournei_newGene_10166/Phoebe_bournei_newGene_13852/Phoebe_bournei_newGene_15687/Phoebe_bournei_newGene_3072/Phoebe_bournei_newGene_6806	up&down
ko00970	Aminoacyl-tRNA biosynthesis	15/1245	0.8	0.856911	0.903439	Maker00001383.gene/Maker00002602.gene/Maker00002819.gene/Maker00010134.gene/Maker00015231.gene/Maker00019464.gene/Maker00020981.gene/Maker00025722.gene/Maker00028410.gene/Maker00036523.gene/Maker00043615.gene/Maker00044043.gene/Maker00047953.gene/Phoebe_bournei_newGene_11828/Phoebe_bournei_newGene_8339	up&down
ko00130	Ubiquinone and other terpenoid-quinone biosynthesis	14/1245	1.52	0.0714339	0.373509	Maker00001804.gene/Maker00010211.gene/Maker00010733.gene/Maker00012853.gene/Maker00012873.gene/Maker00025500.gene/Maker00028299.gene/Maker00036358.gene/Maker00042058.gene/Maker00042613.gene/Maker00047590.gene/Maker00048052.gene/Phoebe_bournei_newGene_151/Phoebe_bournei_newGene_5861	up&down
ko00592	alpha-Linolenic acid metabolism	14/1245	1.32	0.171838	0.636003	Maker00001684.gene/Maker00011287.gene/Maker00016274.gene/Maker00019822.gene/Maker00020102.gene/Maker00025089.gene/Maker00031072.gene/Maker00032061.gene/Maker00034416.gene/Maker00049250.gene/Maker00051957.gene/Maker00052954.gene/Phoebe_bournei_newGene_18018/Phoebe_bournei_newGene_9925	up&down
ko01212	Fatty acid metabolism	14/1245	1	0.536158	0.891043	Maker00001684.gene/Maker00002125.gene/Maker00020102.gene/Maker00026328.gene/Maker00029691.gene/Maker00031392.gene/Maker00040927.gene/Maker00040930.gene/Maker00044130.gene/Maker00048739.gene/Maker00053933.gene/Phoebe_bournei_newGene_10159/Phoebe_bournei_newGene_14389/Phoebe_bournei_newGene_5786	up&down
ko00920	Sulfur metabolism	13/1245	2.68	0.000597769	0.0150409	Maker00002046.gene/Maker00002273.gene/Maker00008955.gene/Maker00025643.gene/Maker00031120.gene/Maker00031283.gene/Maker00035684.gene/Maker00041593.gene/Maker00043648.gene/Maker00045059.gene/Maker00052782.gene/Maker00053036.gene/Maker00055365.gene	up&down
ko00410	beta-Alanine metabolism	13/1245	1.75	0.0305484	0.206178	Maker00001684.gene/Maker00020102.gene/Maker00020507.gene/Maker00020626.gene/Maker00033473.gene/Maker00037271.gene/Maker00040875.gene/Maker00047564.gene/Maker00048462.gene/Phoebe_bournei_newGene_18074/Phoebe_bournei_newGene_6866/Phoebe_bournei_newGene_7056/Phoebe_bournei_newGene_7421	up&down
ko00280	Valine, leucine and isoleucine degradation	13/1245	1.29	0.199476	0.672097	Maker00012775.gene/Maker00017442.gene/Maker00029691.gene/Maker00033473.gene/Maker00034337.gene/Maker00037271.gene/Maker00037411.gene/Maker00042791.gene/Maker00048462.gene/Maker00053067.gene/Phoebe_bournei_newGene_18074/Phoebe_bournei_newGene_6866/Phoebe_bournei_newGene_7056	up&down
ko00460	Cyanoamino acid metabolism	13/1245	1.02	0.515983	0.891043	Maker00008701.gene/Maker00014599.gene/Maker00024577.gene/Maker00028272.gene/Maker00035684.gene/Maker00039768.gene/Maker00042378.gene/Maker00051385.gene/Maker00056326.gene/Phoebe_bournei_newGene_16119/Phoebe_bournei_newGene_17927/Phoebe_bournei_newGene_2478/Phoebe_bournei_newGene_3248	up&down
ko00240	Pyrimidine metabolism	13/1245	1.01	0.530017	0.891043	Maker00002483.gene/Maker00003897.gene/Maker00011012.gene/Maker00027913.gene/Maker00038982.gene/Maker00040103.gene/Maker00050201.gene/Maker00050270.gene/Maker00054485.gene/Phoebe_bournei_newGene_18713/Phoebe_bournei_newGene_2641/Phoebe_bournei_newGene_3257/Phoebe_bournei_newGene_861	up&down
ko04145	Phagosome	13/1245	0.82	0.813664	0.903439	Maker00002197.gene/Maker00003166.gene/Maker00010240.gene/Maker00017165.gene/Maker00019022.gene/Maker00019400.gene/Maker00024252.gene/Maker00033898.gene/Maker00036072.gene/Maker00050186.gene/Maker00051003.gene/Maker00054749.gene/Phoebe_bournei_newGene_10982	up&down
ko04146	Peroxisome	13/1245	0.75	0.893714	0.903439	Maker00001684.gene/Maker00002879.gene/Maker00011067.gene/Maker00020102.gene/Maker00027865.gene/Maker00030272.gene/Maker00032950.gene/Maker00033021.gene/Maker00039386.gene/Maker00040875.gene/Maker00048739.gene/Maker00053742.gene/Maker00055091.gene	up&down
ko00330	Arginine and proline metabolism	12/1245	1.35	0.169928	0.636003	Maker00002627.gene/Maker00020873.gene/Maker00027621.gene/Maker00033473.gene/Maker00037784.gene/Maker00048462.gene/Maker00051776.gene/Maker00054779.gene/Phoebe_bournei_newGene_10166/Phoebe_bournei_newGene_18074/Phoebe_bournei_newGene_1925/Phoebe_bournei_newGene_6866	up&down
ko00600	Sphingolipid metabolism	12/1245	1.25	0.244695	0.70189	Maker00002400.gene/Maker00007554.gene/Maker00022468.gene/Maker00022498.gene/Maker00029611.gene/Maker00030265.gene/Maker00041540.gene/Maker00043819.gene/Maker00044718.gene/Maker00048284.gene/Maker00055253.gene/Maker00055284.gene	up&down
ko03050	Proteasome	12/1245	0.9	0.696883	0.903439	Maker00015413.gene/Maker00018053.gene/Maker00022457.gene/Maker00023549.gene/Maker00030611.gene/Maker00038640.gene/Maker00052131.gene/Maker00053845.gene/Maker00055096.gene/Phoebe_bournei_newGene_14247/Phoebe_bournei_newGene_15504/Phoebe_bournei_newGene_17446	up&down
ko00350	Tyrosine metabolism	12/1245	0.87	0.741715	0.903439	Maker00010733.gene/Maker00020507.gene/Maker00020626.gene/Maker00034416.gene/Maker00047564.gene/Phoebe_bournei_newGene_10166/Phoebe_bournei_newGene_11837/Phoebe_bournei_newGene_14057/Phoebe_bournei_newGene_3363/Phoebe_bournei_newGene_3370/Phoebe_bournei_newGene_4799/Phoebe_bournei_newGene_9925	up&down
ko00053	Ascorbate and aldarate metabolism	11/1245	1.15	0.359379	0.778001	Maker00012962.gene/Maker00015499.gene/Maker00027542.gene/Maker00033284.gene/Maker00033473.gene/Maker00048462.gene/Maker00055498.gene/Phoebe_bournei_newGene_18074/Phoebe_bournei_newGene_6855/Phoebe_bournei_newGene_6866/Phoebe_bournei_newGene_7686	up&down
ko00071	Fatty acid degradation	11/1245	0.95	0.619074	0.903439	Maker00001684.gene/Maker00015719.gene/Maker00020102.gene/Maker00029691.gene/Maker00033473.gene/Maker00034416.gene/Maker00048462.gene/Maker00048739.gene/Phoebe_bournei_newGene_18074/Phoebe_bournei_newGene_6866/Phoebe_bournei_newGene_9925	up&down
ko00360	Phenylalanine metabolism	11/1245	0.95	0.619074	0.903439	Maker00010733.gene/Maker00020507.gene/Maker00020626.gene/Maker00020691.gene/Maker00029283.gene/Maker00047564.gene/Phoebe_bournei_newGene_10166/Phoebe_bournei_newGene_1925/Phoebe_bournei_newGene_3363/Phoebe_bournei_newGene_3370/Phoebe_bournei_newGene_4799	up&down
ko00730	Thiamine metabolism	10/1245	1.92	0.0296615	0.206178	Maker00008630.gene/Maker00008689.gene/Maker00031353.gene/Maker00037935.gene/Maker00043399.gene/Maker00047320.gene/Maker00048040.gene/Maker00056007.gene/Phoebe_bournei_newGene_11368/Phoebe_bournei_newGene_13970	up&down
ko00770	Pantothenate and CoA biosynthesis	10/1245	1.39	0.177977	0.638143	Maker00002483.gene/Maker00014609.gene/Maker00021305.gene/Maker00039955.gene/Maker00048462.gene/Maker00053067.gene/Phoebe_bournei_newGene_18074/Phoebe_bournei_newGene_18713/Phoebe_bournei_newGene_6613/Phoebe_bournei_newGene_6866	up&down
ko00908	Zeatin biosynthesis	10/1245	1.34	0.20502	0.672097	Maker00022090.gene/Maker00025710.gene/Maker00026960.gene/Maker00029999.gene/Maker00038207.gene/Maker00042800.gene/Maker00054969.gene/Maker00056490.gene/Phoebe_bournei_newGene_10951/Phoebe_bournei_newGene_1532	up&down
ko00513	Various types of N-glycan biosynthesis	10/1245	1.19	0.326927	0.752589	Maker00000901.gene/Maker00007497.gene/Maker00009141.gene/Maker00019688.gene/Maker00025857.gene/Maker00040730.gene/Maker00043415.gene/Maker00046891.gene/Maker00047366.gene/Phoebe_bournei_newGene_17605	up&down
ko03410	Base excision repair	10/1245	1.18	0.343222	0.757311	Maker00001366.gene/Maker00002984.gene/Maker00007853.gene/Maker00020666.gene/Maker00038081.gene/Maker00040539.gene/Maker00044048.gene/Maker00045317.gene/Maker00056169.gene/Phoebe_bournei_newGene_10171	up&down
ko00860	Porphyrin and chlorophyll metabolism	10/1245	1.07	0.459203	0.891043	Maker00002109.gene/Maker00007996.gene/Maker00011199.gene/Maker00012109.gene/Maker00029288.gene/Maker00035081.gene/Maker00037245.gene/Maker00041068.gene/Maker00043733.gene/Phoebe_bournei_newGene_8066	up&down
ko00250	Alanine, aspartate and glutamate metabolism	10/1245	1.06	0.475689	0.891043	Maker00001342.gene/Maker00003905.gene/Maker00017483.gene/Maker00017484.gene/Maker00031514.gene/Maker00033529.gene/Maker00038378.gene/Maker00047965.gene/Phoebe_bournei_newGene_10166/Phoebe_bournei_newGene_7421	up&down
ko00950	Isoquinoline alkaloid biosynthesis	10/1245	0.83	0.779792	0.903439	Maker00020507.gene/Maker00020626.gene/Maker00031403.gene/Maker00047564.gene/Phoebe_bournei_newGene_10166/Phoebe_bournei_newGene_11837/Phoebe_bournei_newGene_14057/Phoebe_bournei_newGene_3363/Phoebe_bournei_newGene_3370/Phoebe_bournei_newGene_4799	up&down
ko03440	Homologous recombination	10/1245	0.71	0.913906	0.903439	Maker00009138.gene/Maker00020846.gene/Maker00032738.gene/Maker00038553.gene/Maker00044048.gene/Maker00050231.gene/Maker00052765.gene/Maker00052902.gene/Phoebe_bournei_newGene_10171/Phoebe_bournei_newGene_11142	up&down
ko00909	Sesquiterpenoid and triterpenoid biosynthesis	9/1245	1.52	0.129332	0.601153	Maker00008799.gene/Maker00041909.gene/Maker00042781.gene/Phoebe_bournei_newGene_10661/Phoebe_bournei_newGene_10664/Phoebe_bournei_newGene_13354/Phoebe_bournei_newGene_17052/Phoebe_bournei_newGene_3535/Phoebe_bournei_newGene_938	up
ko01040	Biosynthesis of unsaturated fatty acids	9/1245	1.49	0.141579	0.601153	Maker00001684.gene/Maker00020102.gene/Maker00031392.gene/Maker00040927.gene/Maker00040930.gene/Maker00044130.gene/Maker00053933.gene/Phoebe_bournei_newGene_14389/Phoebe_bournei_newGene_5786	up&down
ko00531	Glycosaminoglycan degradation	9/1245	1.23	0.30769	0.752589	Maker00002400.gene/Maker00007554.gene/Maker00008687.gene/Maker00009304.gene/Maker00029611.gene/Maker00030265.gene/Maker00041540.gene/Maker00044718.gene/Maker00055284.gene	up&down
ko03022	Basal transcription factors	9/1245	1.09	0.447426	0.891043	Maker00013353.gene/Maker00025479.gene/Maker00032079.gene/Maker00033222.gene/Maker00035388.gene/Maker00039519.gene/Maker00052913.gene/Maker00054374.gene/Phoebe_bournei_newGene_11113	up&down
ko00020	Citrate cycle (TCA cycle)	9/1245	0.69	0.919966	0.903439	Maker00008928.gene/Maker00011481.gene/Maker00018021.gene/Maker00020116.gene/Maker00031348.gene/Maker00033568.gene/Maker00038499.gene/Maker00055823.gene/Phoebe_bournei_newGene_3989	up&down
ko03420	Nucleotide excision repair	9/1245	0.69	0.919966	0.903439	Maker00002984.gene/Maker00013353.gene/Maker00023467.gene/Maker00024193.gene/Maker00039508.gene/Maker00044048.gene/Maker00052913.gene/Maker00054374.gene/Phoebe_bournei_newGene_10171	up&down
ko00450	Selenocompound metabolism	8/1245	2.71	0.00632311	0.0806104	Maker00025643.gene/Maker00025669.gene/Maker00031120.gene/Maker00031283.gene/Maker00038202.gene/Maker00041593.gene/Maker00044043.gene/Phoebe_bournei_newGene_4151	up&down
ko00740	Riboflavin metabolism	8/1245	1.88	0.0551801	0.333221	Maker00002483.gene/Maker00003890.gene/Maker00012881.gene/Maker00019120.gene/Maker00033075.gene/Phoebe_bournei_newGene_15188/Phoebe_bournei_newGene_1569/Phoebe_bournei_newGene_18713	up&down
ko00760	Nicotinate and nicotinamide metabolism	8/1245	1.38	0.216555	0.684846	Maker00002483.gene/Maker00005448.gene/Maker00007516.gene/Maker00017483.gene/Maker00017484.gene/Maker00025072.gene/Maker00027913.gene/Phoebe_bournei_newGene_18713	up&down
ko03060	Protein export	8/1245	0.92	0.659526	0.903439	Maker00016250.gene/Maker00020500.gene/Maker00024985.gene/Maker00030015.gene/Maker00035408.gene/Maker00036790.gene/Maker00050186.gene/Phoebe_bournei_newGene_17928	up&down
ko00604	Glycosphingolipid biosynthesis - ganglio series	7/1245	1.41	0.221985	0.684846	Maker00002400.gene/Maker00007554.gene/Maker00029611.gene/Maker00030265.gene/Maker00041540.gene/Maker00044718.gene/Maker00055284.gene	up&down
ko00073	Cutin, suberine and wax biosynthesis	7/1245	0.7	0.888776	0.903439	Maker00003942.gene/Maker00008890.gene/Maker00012085.gene/Maker00039330.gene/Maker00048170.gene/Maker00055239.gene/Phoebe_bournei_newGene_16784	up&down
ko00340	Histidine metabolism	6/1245	1.64	0.151943	0.601153	Maker00027894.gene/Maker00033473.gene/Maker00048462.gene/Maker00051376.gene/Phoebe_bournei_newGene_18074/Phoebe_bournei_newGene_6866	up&down
ko00062	Fatty acid elongation	6/1245	1.04	0.528409	0.891043	Maker00026746.gene/Maker00031392.gene/Maker00035216.gene/Maker00040927.gene/Maker00053933.gene/Phoebe_bournei_newGene_5786	up&down
ko00220	Arginine biosynthesis	6/1245	0.94	0.626811	0.903439	Maker00003905.gene/Maker00007501.gene/Maker00032240.gene/Maker00037137.gene/Maker00038378.gene/Phoebe_bournei_newGene_10166	up&down
ko00565	Ether lipid metabolism	6/1245	0.94	0.626811	0.903439	Maker00000428.gene/Maker00002020.gene/Maker00037268.gene/Maker00045874.gene/Maker00049112.gene/Maker00049250.gene	up&down
ko04130	SNARE interactions in vesicular transport	6/1245	0.92	0.645008	0.903439	Maker00019179.gene/Maker00025934.gene/Maker00026312.gene/Maker00027889.gene/Maker00035574.gene/Maker00045434.gene	up&down
ko00960	Tropane, piperidine and pyridine alkaloid biosynthesis	6/1245	0.89	0.679749	0.903439	Maker00010733.gene/Maker00020507.gene/Maker00020626.gene/Maker00047564.gene/Phoebe_bournei_newGene_10166/Phoebe_bournei_newGene_4799	up&down
ko04136	Autophagy - other	6/1245	0.89	0.679749	0.903439	Maker00002605.gene/Maker00022149.gene/Maker00037261.gene/Maker00055322.gene/Phoebe_bournei_newGene_17930/Phoebe_bournei_newGene_3912	up&down
ko00640	Propanoate metabolism	6/1245	0.82	0.756526	0.903439	Maker00001684.gene/Maker00020102.gene/Maker00029691.gene/Maker00037271.gene/Maker00040875.gene/Phoebe_bournei_newGene_7056	up&down
ko00061	Fatty acid biosynthesis	6/1245	0.7	0.876259	0.903439	Maker00002125.gene/Maker00026328.gene/Maker00040930.gene/Maker00044130.gene/Maker00048739.gene/Phoebe_bournei_newGene_10159	up&down
ko00400	Phenylalanine, tyrosine and tryptophan biosynthesis	6/1245	0.65	0.911632	0.903439	Maker00031152.gene/Maker00031523.gene/Maker00036207.gene/Maker00047669.gene/Phoebe_bournei_newGene_10166/Phoebe_bournei_newGene_4799	up&down
ko03430	Mismatch repair	6/1245	0.53	0.974793	0.903439	Maker00001382.gene/Maker00002984.gene/Maker00022166.gene/Maker00043711.gene/Maker00044048.gene/Phoebe_bournei_newGene_10171	up&down
ko01210	2-Oxocarboxylic acid metabolism	6/1245	0.47	0.991197	0.903439	Maker00007501.gene/Maker00008928.gene/Maker00037137.gene/Maker00039955.gene/Maker00053067.gene/Phoebe_bournei_newGene_10166	up&down
ko00780	Biotin metabolism	5/1245	1.41	0.276887	0.738818	Maker00026328.gene/Maker00039644.gene/Maker00048112.gene/Phoebe_bournei_newGene_10159/Phoebe_bournei_newGene_4433	up&down
ko00650	Butanoate metabolism	5/1245	1.01	0.563898	0.89861	Maker00001273.gene/Maker00020691.gene/Maker00029691.gene/Phoebe_bournei_newGene_2208/Phoebe_bournei_newGene_7421	up&down
ko00965	Betalain biosynthesis	5/1245	0.85	0.7195	0.903439	Maker00014173.gene/Maker00026107.gene/Maker00042434.gene/Phoebe_bournei_newGene_3363/Phoebe_bournei_newGene_3370	up&down
ko03030	DNA replication	5/1245	0.49	0.980052	0.903439	Maker00002984.gene/Maker00044048.gene/Maker00046470.gene/Phoebe_bournei_newGene_10171/Phoebe_bournei_newGene_13444	up&down
ko00670	One carbon pool by folate	4/1245	1.3	0.369577	0.78526	Maker00024577.gene/Maker00029579.gene/Maker00042378.gene/Phoebe_bournei_newGene_14872	up&down
ko00904	Diterpenoid biosynthesis	4/1245	0.57	0.929823	0.903439	Maker00002576.gene/Maker00002862.gene/Maker00036780.gene/Maker00044129.gene	up&down
ko00910	Nitrogen metabolism	4/1245	0.56	0.935354	0.903439	Maker00003905.gene/Maker00025876.gene/Maker00026123.gene/Maker00039768.gene	up&down
ko00941	Flavonoid biosynthesis	4/1245	0.4	0.992992	0.903439	Maker00008214.gene/Maker00027401.gene/Maker00031067.gene/Maker00052581.gene	up&down
ko00195	Photosynthesis	4/1245	0.21	0.999996	0.903439	Maker00022529.gene/Maker00032766.gene/Maker00047250.gene/Maker00047282.gene	up&down
ko00903	Limonene and pinene degradation	3/1245	2.31	0.131824	0.601153	Maker00048462.gene/Phoebe_bournei_newGene_18074/Phoebe_bournei_newGene_6866	up
ko00261	Monobactam biosynthesis	3/1245	1.69	0.257519	0.720657	Maker00031120.gene/Maker00031283.gene/Maker00041593.gene	up&down
ko00905	Brassinosteroid biosynthesis	3/1245	0.98	0.607742	0.903439	Maker00053077.gene/Phoebe_bournei_newGene_324/Phoebe_bournei_newGene_9530	up&down
ko00100	Steroid biosynthesis	3/1245	0.69	0.829551	0.903439	Maker00042781.gene/Maker00049250.gene/Phoebe_bournei_newGene_10974	up&down
ko00590	Arachidonic acid metabolism	3/1245	0.58	0.905969	0.903439	Maker00017791.gene/Maker00049250.gene/Phoebe_bournei_newGene_3248	up&down
ko00902	Monoterpenoid biosynthesis	3/1245	0.4	0.985557	0.903439	Maker00000759.gene/Maker00020743.gene/Maker00049049.gene	up&down
ko03020	RNA polymerase	3/1245	0.22	0.999947	0.903439	Maker00030857.gene/Maker00031415.gene/Phoebe_bournei_newGene_1602	down
ko00998	Biosynthesis of various secondary metabolites - part 2	2/1245	2.82	0.151594	0.601153	Maker00037406.gene/Phoebe_bournei_newGene_3439	down
ko00430	Taurine and hypotaurine metabolism	2/1245	2.12	0.242227	0.70189	Phoebe_bournei_newGene_3248/Phoebe_bournei_newGene_7421	up&down
ko00901	Indole alkaloid biosynthesis	2/1245	1.88	0.288556	0.752454	Maker00025990.gene/Maker00031460.gene	up&down
ko00943	Isoflavonoid biosynthesis	2/1245	1.69	0.334523	0.752589	Phoebe_bournei_newGene_802/Phoebe_bournei_newGene_805	down
ko00440	Phosphonate and phosphinate metabolism	2/1245	1.21	0.505471	0.891043	Maker00000428.gene/Maker00035669.gene	down
ko00603	Glycosphingolipid biosynthesis - globo and isoglobo series	2/1245	1.21	0.505471	0.891043	Maker00001278.gene/Maker00055253.gene	down
ko00591	Linoleic acid metabolism	2/1245	1.13	0.543618	0.891043	Maker00049250.gene/Maker00052954.gene	down
ko00750	Vitamin B6 metabolism	2/1245	1.13	0.543618	0.891043	Maker00029982.gene/Maker00035528.gene	up&down
ko00514	Other types of O-glycan biosynthesis	2/1245	0.74	0.773884	0.903439	Maker00007715.gene/Maker00027005.gene	up&down
ko00290	Valine, leucine and isoleucine biosynthesis	2/1245	0.5	0.923021	0.903439	Maker00039955.gene/Maker00053067.gene	up&down
ko00790	Folate biosynthesis	2/1245	0.33	0.988605	0.903439	Maker00010259.gene/Maker00012881.gene	up&down
ko00601	Glycosphingolipid biosynthesis - lacto and neolacto series	1/1245	2.82	0.314233	0.752589	Maker00001278.gene	down
ko03450	Non-homologous end-joining	1/1245	0.94	0.677611	0.903439	Maker00009138.gene	down
ko04122	Sulfur relay system	1/1245	0.85	0.715731	0.903439	Maker00047503.gene	up
ko00402	Benzoxazinoid biosynthesis	1/1245	0.65	0.805132	0.903439	Phoebe_bournei_newGene_8915	up
ko00072	Synthesis and degradation of ketone bodies	1/1245	0.53	0.866433	0.903439	Maker00029691.gene	up
ko00966	Glucosinolate biosynthesis	1/1245	0.29	0.974041	0.903439	Maker00053067.gene	up
ko00563	Glycosylphosphatidylinositol (GPI)-anchor biosynthesis	1/1245	0.2	0.995563	0.903439	Maker00049870.gene	down

## Sheet: Table S6
Table S6. KEGG pathway enrichment analysis of DEGs between TZ and SW1
KEGG ID	Description	GeneRatio	Enrich factor	p value	q value	Gene ID	Regulated
ko04626	Plant-pathogen interaction	32/269	1.15	0.222938	0.573642	Maker00000578.gene/Maker00002592.gene/Maker00003832.gene/Maker00004273.gene/Maker00011928.gene/Maker00014965.gene/Maker00021945.gene/Maker00026879.gene/Maker00027250.gene/Maker00027367.gene/Maker00028411.gene/Maker00031044.gene/Maker00031107.gene/Maker00034525.gene/Maker00037458.gene/Maker00037640.gene/Maker00041416.gene/Maker00045089.gene/Maker00045141.gene/Maker00045608.gene/Maker00046508.gene/…	up&down
ko04075	Plant hormone signal transduction	29/269	1.53	0.0141565	0.163918	Maker00000934.gene/Maker00001262.gene/Maker00001535.gene/Maker00003879.gene/Maker00003884.gene/Maker00005392.gene/Maker00005801.gene/Maker00010138.gene/Maker00010556.gene/Maker00010853.gene/Maker00018812.gene/Maker00021022.gene/Maker00024972.gene/Maker00025187.gene/Maker00025242.gene/Maker00026758.gene/Maker00028484.gene/Maker00028633.gene/Maker00030330.gene/Maker00031138.gene/Maker00034525.gene/…	up&down
ko04016	MAPK signaling pathway - plant	25/269	1.94	0.00115174	0.0401701	Maker00001762.gene/Maker00004273.gene/Maker00010138.gene/Maker00010556.gene/Maker00013341.gene/Maker00014965.gene/Maker00018812.gene/Maker00021721.gene/Maker00025242.gene/Maker00026758.gene/Maker00027250.gene/Maker00027367.gene/Maker00028633.gene/Maker00034525.gene/Maker00035483.gene/Maker00035605.gene/Maker00037640.gene/Maker00041053.gene/Maker00045004.gene/Maker00045608.gene/Maker00052226.gene/…	up&down
ko00052	Galactose metabolism	16/269	3.92	3.13678e-06	0.000290565	Maker00002400.gene/Maker00007554.gene/Maker00011532.gene/Maker00015852.gene/Maker00020614.gene/Maker00026923.gene/Maker00029887.gene/Maker00033713.gene/Maker00044400.gene/Maker00044406.gene/Maker00044718.gene/Maker00045354.gene/Maker00053013.gene/Maker00055284.gene/Maker00056253.gene/Phoebe_bournei_newGene_8880	up&down
ko00500	Starch and sucrose metabolism	16/269	1.72	0.0249014	0.181836	Maker00013857.gene/Maker00014599.gene/Maker00020518.gene/Maker00021774.gene/Maker00025496.gene/Maker00026946.gene/Maker00029547.gene/Maker00029887.gene/Maker00030441.gene/Maker00033435.gene/Maker00033713.gene/Maker00033928.gene/Maker00042880.gene/Maker00042921.gene/Phoebe_bournei_newGene_16119/Phoebe_bournei_newGene_8880	up&down
ko01200	Carbon metabolism	15/269	1.34	0.151992	0.49429	Maker00003252.gene/Maker00018021.gene/Maker00020102.gene/Maker00020691.gene/Maker00024577.gene/Maker00026650.gene/Maker00033004.gene/Maker00037191.gene/Maker00041052.gene/Maker00042378.gene/Maker00044561.gene/Maker00054745.gene/Maker00056253.gene/Maker00056471.gene/Phoebe_bournei_newGene_11067	up&down
ko02010	ABC transporters	12/269	2.78	0.00130096	0.0401701	Maker00011921.gene/Maker00015740.gene/Maker00026139.gene/Maker00028203.gene/Maker00035689.gene/Maker00036286.gene/Maker00036309.gene/Maker00036327.gene/Maker00047596.gene/Maker00051085.gene/Maker00056187.gene/Phoebe_bournei_newGene_16865	up&down
ko00230	Purine metabolism	11/269	2.14	0.014057	0.163918	Maker00007486.gene/Maker00020518.gene/Maker00023537.gene/Maker00031120.gene/Maker00033713.gene/Maker00037664.gene/Maker00041593.gene/Maker00045059.gene/Maker00046299.gene/Maker00056471.gene/Phoebe_bournei_newGene_8880	up&down
ko04144	Endocytosis	11/269	1.04	0.493164	0.81576	Maker00000448.gene/Maker00004869.gene/Maker00015717.gene/Maker00020601.gene/Maker00035356.gene/Maker00036820.gene/Maker00037548.gene/Maker00052497.gene/Phoebe_bournei_newGene_17783/Phoebe_bournei_newGene_8626/Phoebe_bournei_newGene_8627	up&down
ko04120	Ubiquitin mediated proteolysis	10/269	1.42	0.1688	0.49429	Maker00004961.gene/Maker00005052.gene/Maker00014571.gene/Maker00014578.gene/Maker00015581.gene/Maker00020484.gene/Maker00035342.gene/Maker00040704.gene/Maker00045017.gene/Phoebe_bournei_newGene_8935	up&down
ko01230	Biosynthesis of amino acids	10/269	1.07	0.462416	0.808194	Maker00003905.gene/Maker00024577.gene/Maker00027894.gene/Maker00038378.gene/Maker00042378.gene/Maker00044561.gene/Maker00051376.gene/Maker00054745.gene/Maker00056253.gene/Maker00056471.gene	up&down
ko00630	Glyoxylate and dicarboxylate metabolism	9/269	2.18	0.0230298	0.181836	Maker00003252.gene/Maker00003905.gene/Maker00016780.gene/Maker00018021.gene/Maker00024577.gene/Maker00041052.gene/Maker00042378.gene/Maker00044561.gene/Phoebe_bournei_newGene_11067	up&down
ko00940	Phenylpropanoid biosynthesis	9/269	1.28	0.27005	0.670222	Maker00002157.gene/Maker00012757.gene/Maker00014599.gene/Maker00017783.gene/Maker00027610.gene/Maker00042880.gene/Maker00042921.gene/Phoebe_bournei_newGene_16119/Phoebe_bournei_newGene_7934	up&down
ko00010	Glycolysis / Gluconeogenesis	8/269	1.42	0.204128	0.540247	Maker00033713.gene/Maker00037191.gene/Maker00054745.gene/Maker00056253.gene/Maker00056471.gene/Phoebe_bournei_newGene_4846/Phoebe_bournei_newGene_8880/Phoebe_bournei_newGene_9925	up&down
ko00460	Cyanoamino acid metabolism	7/269	2.54	0.0204819	0.181836	Maker00014599.gene/Maker00024577.gene/Maker00042378.gene/Maker00042880.gene/Maker00042921.gene/Phoebe_bournei_newGene_16119/Phoebe_bournei_newGene_3248	up&down
ko01212	Fatty acid metabolism	7/269	2.32	0.0313401	0.193539	Maker00001675.gene/Maker00002125.gene/Maker00020102.gene/Maker00040927.gene/Maker00040930.gene/Phoebe_bournei_newGene_14387/Phoebe_bournei_newGene_14389	up&down
ko00480	Glutathione metabolism	7/269	1.7	0.11811	0.455865	Maker00006259.gene/Maker00015499.gene/Maker00033004.gene/Maker00036689.gene/Maker00036712.gene/Phoebe_bournei_newGene_3248/Phoebe_bournei_newGene_6855	up&down
ko04141	Protein processing in endoplasmic reticulum	7/269	0.68	0.897411	0.890633	Maker00030402.gene/Maker00040704.gene/Maker00049612.gene/Maker00050186.gene/Maker00054946.gene/Maker00055622.gene/Phoebe_bournei_newGene_8752	up&down
ko00531	Glycosaminoglycan degradation	6/269	3.79	0.00486072	0.0900513	Maker00002400.gene/Maker00007554.gene/Maker00044718.gene/Maker00045354.gene/Maker00051135.gene/Maker00055284.gene	up&down
ko00511	Other glycan degradation	6/269	2.58	0.0287105	0.189964	Maker00002400.gene/Maker00007554.gene/Maker00037630.gene/Maker00044718.gene/Maker00045354.gene/Maker00055284.gene	up&down
ko00030	Pentose phosphate pathway	6/269	2.18	0.0580076	0.282807	Maker00026650.gene/Maker00033004.gene/Maker00033713.gene/Maker00037191.gene/Maker00056253.gene/Phoebe_bournei_newGene_8880	up&down
ko00562	Inositol phosphate metabolism	6/269	1.22	0.370825	0.730854	Maker00007013.gene/Maker00025593.gene/Maker00025814.gene/Maker00037268.gene/Maker00054745.gene/Maker00054790.gene	up&down
ko00604	Glycosphingolipid biosynthesis - ganglio series	5/269	4.66	0.0041039	0.0900513	Maker00002400.gene/Maker00007554.gene/Maker00044718.gene/Maker00045354.gene/Maker00055284.gene	up&down
ko01040	Biosynthesis of unsaturated fatty acids	5/269	3.84	0.00941538	0.14536	Maker00020102.gene/Maker00040927.gene/Maker00040930.gene/Phoebe_bournei_newGene_14387/Phoebe_bournei_newGene_14389	up&down
ko00600	Sphingolipid metabolism	5/269	2.42	0.0558444	0.282807	Maker00002400.gene/Maker00007554.gene/Maker00044718.gene/Maker00045354.gene/Maker00055284.gene	up&down
ko00260	Glycine, serine and threonine metabolism	5/269	1.98	0.108918	0.449916	Maker00003252.gene/Maker00024577.gene/Maker00041052.gene/Maker00042378.gene/Maker00044561.gene	up&down
ko00051	Fructose and mannose metabolism	5/269	1.7	0.170755	0.49429	Maker00020518.gene/Maker00021774.gene/Maker00037191.gene/Maker00054745.gene/Maker00056253.gene	up&down
ko00561	Glycerolipid metabolism	5/269	1.22	0.392996	0.742935	Maker00001211.gene/Maker00024705.gene/Maker00041052.gene/Maker00045089.gene/Phoebe_bournei_newGene_4846	up&down
ko03018	RNA degradation	5/269	0.83	0.724687	0.88532	Maker00001778.gene/Maker00002565.gene/Maker00027466.gene/Maker00036635.gene/Maker00056253.gene	up&down
ko00520	Amino sugar and nucleotide sugar metabolism	5/269	0.68	0.867589	0.890633	Maker00020614.gene/Maker00021774.gene/Maker00029887.gene/Maker00033713.gene/Phoebe_bournei_newGene_8880	up&down
ko00920	Sulfur metabolism	4/269	3.82	0.0200535	0.181836	Maker00008955.gene/Maker00031120.gene/Maker00041593.gene/Maker00045059.gene	up&down
ko00760	Nicotinate and nicotinamide metabolism	4/269	3.2	0.0358626	0.207626	Maker00005448.gene/Maker00007516.gene/Maker00027913.gene/Maker00046299.gene	up&down
ko03410	Base excision repair	4/269	2.18	0.111712	0.449916	Maker00001366.gene/Maker00007853.gene/Maker00020666.gene/Maker00050290.gene	up
ko00240	Pyrimidine metabolism	4/269	1.44	0.303221	0.670222	Maker00003897.gene/Maker00027913.gene/Maker00040103.gene/Maker00046299.gene	up&down
ko00710	Carbon fixation in photosynthetic organisms	4/269	1.26	0.390402	0.742935	Maker00018021.gene/Maker00037191.gene/Maker00044561.gene/Maker00054745.gene	up
ko00040	Pentose and glucuronate interconversions	4/269	0.7	0.825719	0.890633	Maker00029887.gene/Maker00042934.gene/Maker00043654.gene/Phoebe_bournei_newGene_4846	up&down
ko00190	Oxidative phosphorylation	4/269	0.49	0.965849	0.890633	Maker00027267.gene/Maker00035429.gene/Maker00051299.gene/Phoebe_bournei_newGene_10982	up&down
ko03013	RNA transport	4/269	0.44	0.982523	0.890633	Maker00002565.gene/Maker00010214.gene/Maker00024260.gene/Maker00029573.gene	up&down
ko00730	Thiamine metabolism	3/269	2.67	0.101554	0.447958	Maker00007486.gene/Maker00048040.gene/Phoebe_bournei_newGene_13970	up&down
ko00790	Folate biosynthesis	3/269	2.26	0.146773	0.49429	Maker00012881.gene/Maker00013543.gene/Maker00037262.gene	up&down
ko00220	Arginine biosynthesis	3/269	2.18	0.158962	0.49429	Maker00003905.gene/Maker00038378.gene/Maker00044561.gene	up
ko04130	SNARE interactions in vesicular transport	3/269	2.14	0.16517	0.49429	Maker00025934.gene/Maker00027889.gene/Maker00035574.gene	up&down
ko00061	Fatty acid biosynthesis	3/269	1.61	0.285772	0.670222	Maker00001675.gene/Maker00002125.gene/Maker00040930.gene	up&down
ko03060	Protein export	3/269	1.59	0.292765	0.670222	Maker00036790.gene/Maker00050186.gene/Phoebe_bournei_newGene_15973	up&down
ko00130	Ubiquinone and other terpenoid-quinone biosynthesis	3/269	1.51	0.320826	0.689335	Maker00001804.gene/Maker00010733.gene/Phoebe_bournei_newGene_5861	up&down
ko00860	Porphyrin and chlorophyll metabolism	3/269	1.49	0.327851	0.689335	Maker00029288.gene/Maker00043733.gene/Phoebe_bournei_newGene_8066	up&down
ko00250	Alanine, aspartate and glutamate metabolism	3/269	1.47	0.334876	0.689335	Maker00003905.gene/Maker00038378.gene/Maker00044561.gene	up
ko00073	Cutin, suberine and wax biosynthesis	3/269	1.38	0.369907	0.730854	Maker00003942.gene/Maker00008890.gene/Maker00055239.gene	up&down
ko00350	Tyrosine metabolism	3/269	1	0.577902	0.863419	Maker00010733.gene/Phoebe_bournei_newGene_4224/Phoebe_bournei_newGene_9925	up&down
ko03440	Homologous recombination	3/269	0.98	0.595155	0.875082	Maker00020846.gene/Maker00052765.gene/Phoebe_bournei_newGene_11142	up&down
ko04145	Phagosome	3/269	0.88	0.66945	0.88532	Maker00036072.gene/Maker00050186.gene/Phoebe_bournei_newGene_10982	up&down
ko04146	Peroxisome	3/269	0.8	0.724817	0.88532	Maker00020102.gene/Maker00055091.gene/Phoebe_bournei_newGene_16865	up&down
ko00620	Pyruvate metabolism	3/269	0.77	0.753632	0.890633	Maker00001675.gene/Maker00018021.gene/Maker00056471.gene	up&down
ko00270	Cysteine and methionine metabolism	3/269	0.69	0.816675	0.890633	Maker00015426.gene/Maker00018021.gene/Maker00033507.gene	up&down
ko00564	Glycerophospholipid metabolism	3/269	0.63	0.863136	0.890633	Maker00024705.gene/Maker00037268.gene/Maker00037548.gene	up&down
ko03040	Spliceosome	3/269	0.29	0.998439	0.890633	Maker00016025.gene/Maker00017827.gene/Maker00039996.gene	up&down
ko00943	Isoflavonoid biosynthesis	2/269	7.83	0.025519	0.181836	Phoebe_bournei_newGene_802/Phoebe_bournei_newGene_805	down
ko00261	Monobactam biosynthesis	2/269	5.22	0.0547809	0.282807	Maker00031120.gene/Maker00041593.gene	up&down
ko00450	Selenocompound metabolism	2/269	3.13	0.132849	0.492242	Maker00031120.gene/Maker00041593.gene	up&down
ko00670	One carbon pool by folate	2/269	3.01	0.14161	0.49429	Maker00024577.gene/Maker00042378.gene	up&down
ko00340	Histidine metabolism	2/269	2.53	0.186969	0.509389	Maker00027894.gene/Maker00051376.gene	down
ko00650	Butanoate metabolism	2/269	1.87	0.29111	0.670222	Maker00020691.gene/Phoebe_bournei_newGene_11067	up
ko00565	Ether lipid metabolism	2/269	1.45	0.402715	0.746083	Maker00037268.gene/Maker00037548.gene	down
ko04136	Autophagy - other	2/269	1.37	0.429405	0.779931	Maker00022149.gene/Maker00055322.gene	up
ko00904	Diterpenoid biosynthesis	2/269	1.33	0.446846	0.796001	Maker00002576.gene/Maker00036780.gene	up
ko00640	Propanoate metabolism	2/269	1.26	0.472438	0.809785	Maker00001675.gene/Maker00020102.gene	down
ko00908	Zeatin biosynthesis	2/269	1.24	0.48081	0.809785	Maker00025710.gene/Maker00026960.gene	up&down
ko00906	Carotenoid biosynthesis	2/269	1.14	0.529283	0.855268	Maker00031262.gene/Maker00044878.gene	down
ko00513	Various types of N-glycan biosynthesis	2/269	1.1	0.544747	0.855268	Maker00025857.gene/Maker00046891.gene	down
ko00310	Lysine degradation	2/269	1.07	0.559855	0.863419	Maker00013670.gene/Maker00015370.gene	down
ko00330	Arginine and proline metabolism	2/269	1.04	0.574603	0.863419	Maker00002627.gene/Maker00020873.gene	down
ko00053	Ascorbate and aldarate metabolism	2/269	0.97	0.616672	0.87882	Maker00015499.gene/Phoebe_bournei_newGene_6855	up
ko00900	Terpenoid backbone biosynthesis	2/269	0.91	0.64924	0.88532	Maker00029288.gene/Phoebe_bournei_newGene_13970	up
ko00592	alpha-Linolenic acid metabolism	2/269	0.87	0.673689	0.88532	Maker00020102.gene/Phoebe_bournei_newGene_9925	up&down
ko00071	Fatty acid degradation	2/269	0.8	0.718432	0.88532	Maker00020102.gene/Phoebe_bournei_newGene_9925	up&down
ko00360	Phenylalanine metabolism	2/269	0.8	0.718432	0.88532	Maker00010733.gene/Maker00020691.gene	up
ko04712	Circadian rhythm - plant	2/269	0.71	0.775807	0.890633	Maker00008419.gene/Maker00039348.gene	up&down
ko04070	Phosphatidylinositol signaling system	2/269	0.45	0.938362	0.890633	Maker00024705.gene/Maker00054790.gene	up&down
ko03015	mRNA surveillance pathway	2/269	0.38	0.971322	0.890633	Maker00002565.gene/Maker00009521.gene	down
ko03010	Ribosome	2/269	0.17	0.999937	0.890633	Maker00043943.gene/Phoebe_bournei_newGene_734	up
ko00601	Glycosphingolipid biosynthesis - lacto and neolacto series	1/269	13.06	0.0746487	0.345741	Maker00001278.gene	down
ko00430	Taurine and hypotaurine metabolism	1/269	4.9	0.186927	0.509389	Phoebe_bournei_newGene_3248	down
ko00603	Glycosphingolipid biosynthesis - globo and isoglobo series	1/269	2.8	0.303885	0.670222	Maker00001278.gene	down
ko00780	Biotin metabolism	1/269	1.31	0.540137	0.855268	Maker00039644.gene	up
ko00740	Riboflavin metabolism	1/269	1.09	0.606417	0.877708	Maker00012881.gene	down
ko00590	Arachidonic acid metabolism	1/269	0.89	0.680218	0.88532	Phoebe_bournei_newGene_3248	down
ko00945	Stilbenoid, diarylheptanoid and gingerol biosynthesis	1/269	0.89	0.680218	0.88532	Maker00017783.gene	down
ko00062	Fatty acid elongation	1/269	0.8	0.719163	0.88532	Maker00040927.gene	down
ko00965	Betalain biosynthesis	1/269	0.78	0.726365	0.88532	Maker00026107.gene	down
ko00960	Tropane, piperidine and pyridine alkaloid biosynthesis	1/269	0.69	0.771883	0.890633	Maker00010733.gene	up
ko00910	Nitrogen metabolism	1/269	0.65	0.789001	0.890633	Maker00003905.gene	up
ko00410	beta-Alanine metabolism	1/269	0.62	0.80484	0.890633	Maker00020102.gene	down
ko03022	Basal transcription factors	1/269	0.56	0.837341	0.890633	Maker00013353.gene	up
ko00510	N-Glycan biosynthesis	1/269	0.48	0.877862	0.890633	Maker00046891.gene	down
ko00280	Valine, leucine and isoleucine degradation	1/269	0.46	0.889955	0.890633	Maker00034337.gene	down
ko00941	Flavonoid biosynthesis	1/269	0.46	0.889955	0.890633	Maker00017783.gene	down
ko03030	DNA replication	1/269	0.46	0.892787	0.890633	Phoebe_bournei_newGene_13444	down
ko01210	2-Oxocarboxylic acid metabolism	1/269	0.36	0.939623	0.890633	Maker00044561.gene	up
ko00020	Citrate cycle (TCA cycle)	1/269	0.35	0.944175	0.890633	Maker00018021.gene	up
ko03420	Nucleotide excision repair	1/269	0.35	0.944175	0.890633	Maker00013353.gene	up
ko03050	Proteasome	1/269	0.35	0.947018	0.890633	Maker00018053.gene	down
ko00380	Tryptophan metabolism	1/269	0.33	0.953511	0.890633	Maker00044610.gene	down
ko00970	Aminoacyl-tRNA biosynthesis	1/269	0.25	0.984125	0.890633	Maker00020981.gene	up
ko03008	Ribosome biogenesis in eukaryotes	1/269	0.23	0.989296	0.890633	Maker00014104.gene	down

## Sheet: Table S7
Table S7. The KEGG category of 528 DEGs between sapwood and transition zone
KEGG Category	KEGG class	Pathway	Gene number in pathway	Gene_id
Organismal Systems	Environmental adaptation	Plant-pathogen interaction	28	Maker00000578.gene;Maker00002592.gene;Maker00003832.gene;Maker00004273.gene;Maker00011928.gene;Maker00014965.gene;Maker00021945.gene;Maker00026879.gene;Maker00027250.gene;Maker00027367.gene;Maker00028411.gene;Maker00031044.gene;Maker00031107.gene;Maker00034525.gene;Maker00037458.gene;Maker00037640.gene;Maker00041416.gene;Maker00045141.gene;Maker00046508.gene;Maker00049222.gene;Maker00052226.gene;…
Environmental Information Processing	Signal transduction	Plant hormone signal transduction	23	Maker00000934.gene;Maker00001262.gene;Maker00001535.gene;Maker00003879.gene;Maker00003884.gene;Maker00005392.gene;Maker00010556.gene;Maker00010853.gene;Maker00018812.gene;Maker00021022.gene;Maker00024972.gene;Maker00025187.gene;Maker00025242.gene;Maker00026758.gene;Maker00028484.gene;Maker00028633.gene;Maker00034525.gene;Maker00037640.gene;Maker00041053.gene;Maker00044592.gene;Maker00055260.gene;…
Environmental Information Processing	Signal transduction	MAPK signaling pathway - plant	21	Maker00001762.gene;Maker00004273.gene;Maker00010556.gene;Maker00013341.gene;Maker00014965.gene;Maker00018812.gene;Maker00021721.gene;Maker00025242.gene;Maker00026758.gene;Maker00027250.gene;Maker00027367.gene;Maker00028633.gene;Maker00034525.gene;Maker00035483.gene;Maker00037640.gene;Maker00041053.gene;Maker00045004.gene;Maker00052226.gene;Phoebe_bournei_newGene_13533;Phoebe_bournei_newGene_14540…
Metabolism	Global and overview maps	Carbon metabolism	12	Maker00003252.gene;Maker00018021.gene;Maker00020102.gene;Maker00020691.gene;Maker00024577.gene;Maker00026650.gene;Maker00033004.gene;Maker00037191.gene;Maker00041052.gene;Maker00042378.gene;Maker00054745.gene;Maker00056471.gene
Metabolism	Carbohydrate metabolism	Galactose metabolism	11	Maker00002400.gene;Maker00007554.gene;Maker00011532.gene;Maker00015852.gene;Maker00020614.gene;Maker00026923.gene;Maker00029887.gene;Maker00033713.gene;Maker00044406.gene;Maker00044718.gene;Maker00055284.gene
Metabolism	Carbohydrate metabolism	Starch and sucrose metabolism	10	Maker00013857.gene;Maker00021774.gene;Maker00025496.gene;Maker00026946.gene;Maker00029887.gene;Maker00030441.gene;Maker00033435.gene;Maker00033713.gene;Maker00033928.gene;Phoebe_bournei_newGene_16119
Environmental Information Processing	Membrane transport	ABC transporters	9	Maker00011921.gene;Maker00026139.gene;Maker00028203.gene;Maker00036286.gene;Maker00036309.gene;Maker00036327.gene;Maker00047596.gene;Maker00051085.gene;Maker00056187.gene
Metabolism	Global and overview maps	Biosynthesis of amino acids	8	Maker00003905.gene;Maker00024577.gene;Maker00027894.gene;Maker00038378.gene;Maker00042378.gene;Maker00051376.gene;Maker00054745.gene;Maker00056471.gene
Genetic Information Processing	Folding, sorting and degradation	Ubiquitin mediated proteolysis	8	Maker00004961.gene;Maker00005052.gene;Maker00015581.gene;Maker00020484.gene;Maker00035342.gene;Maker00040704.gene;Maker00045017.gene;Phoebe_bournei_newGene_8935
Metabolism	Nucleotide metabolism	Purine metabolism	7	Maker00023537.gene;Maker00031120.gene;Maker00033713.gene;Maker00037664.gene;Maker00041593.gene;Maker00045059.gene;Maker00056471.gene
Cellular Processes	Transport and catabolism	Endocytosis	7	Maker00000448.gene;Maker00015717.gene;Maker00036820.gene;Maker00052497.gene;Phoebe_bournei_newGene_17783;Phoebe_bournei_newGene_8626;Phoebe_bournei_newGene_8627
Genetic Information Processing	Folding, sorting and degradation	Protein processing in endoplasmic reticulum	7	Maker00030402.gene;Maker00040704.gene;Maker00049612.gene;Maker00050186.gene;Maker00054946.gene;Maker00055622.gene;Phoebe_bournei_newGene_8752
Metabolism	Metabolism of other amino acids	Glutathione metabolism	6	Maker00006259.gene;Maker00015499.gene;Maker00033004.gene;Maker00036689.gene;Phoebe_bournei_newGene_3248;Phoebe_bournei_newGene_6855
Metabolism	Carbohydrate metabolism	Glyoxylate and dicarboxylate metabolism	6	Maker00003252.gene;Maker00003905.gene;Maker00018021.gene;Maker00024577.gene;Maker00041052.gene;Maker00042378.gene
Metabolism	Carbohydrate metabolism	Glycolysis / Gluconeogenesis	6	Maker00033713.gene;Maker00037191.gene;Maker00054745.gene;Maker00056471.gene;Phoebe_bournei_newGene_4846;Phoebe_bournei_newGene_9925
Metabolism	Global and overview maps	Fatty acid metabolism	5	Maker00002125.gene;Maker00020102.gene;Maker00040927.gene;Maker00040930.gene;Phoebe_bournei_newGene_14389
Metabolism	Carbohydrate metabolism	Inositol phosphate metabolism	5	Maker00025593.gene;Maker00025814.gene;Maker00037268.gene;Maker00054745.gene;Maker00054790.gene
Metabolism	Glycan biosynthesis and metabolism	Other glycan degradation	5	Maker00002400.gene;Maker00007554.gene;Maker00037630.gene;Maker00044718.gene;Maker00055284.gene
Metabolism	Energy metabolism	Sulfur metabolism	4	Maker00008955.gene;Maker00031120.gene;Maker00041593.gene;Maker00045059.gene
Metabolism	Carbohydrate metabolism	Amino sugar and nucleotide sugar metabolism	4	Maker00020614.gene;Maker00021774.gene;Maker00029887.gene;Maker00033713.gene
Metabolism	Glycan biosynthesis and metabolism	Glycosaminoglycan degradation	4	Maker00002400.gene;Maker00007554.gene;Maker00044718.gene;Maker00055284.gene
Metabolism	Lipid metabolism	Sphingolipid metabolism	4	Maker00002400.gene;Maker00007554.gene;Maker00044718.gene;Maker00055284.gene
Metabolism	Carbohydrate metabolism	Pentose phosphate pathway	4	Maker00026650.gene;Maker00033004.gene;Maker00033713.gene;Maker00037191.gene
Metabolism	Glycan biosynthesis and metabolism	Glycosphingolipid biosynthesis - ganglio series	4	Maker00002400.gene;Maker00007554.gene;Maker00044718.gene;Maker00055284.gene
Genetic Information Processing	Translation	RNA transport	4	Maker00002565.gene;Maker00010214.gene;Maker00024260.gene;Maker00029573.gene
Metabolism	Lipid metabolism	Biosynthesis of unsaturated fatty acids	4	Maker00020102.gene;Maker00040927.gene;Maker00040930.gene;Phoebe_bournei_newGene_14389
Metabolism	Amino acid metabolism	Glycine, serine and threonine metabolism	4	Maker00003252.gene;Maker00024577.gene;Maker00041052.gene;Maker00042378.gene
Metabolism	Energy metabolism	Oxidative phosphorylation	4	Maker00027267.gene;Maker00035429.gene;Maker00051299.gene;Phoebe_bournei_newGene_10982
Metabolism	Metabolism of other amino acids	Cyanoamino acid metabolism	4	Maker00024577.gene;Maker00042378.gene;Phoebe_bournei_newGene_16119;Phoebe_bournei_newGene_3248
Metabolism	Biosynthesis of other secondary metabolites	Phenylpropanoid biosynthesis	4	Maker00002157.gene;Maker00012757.gene;Phoebe_bournei_newGene_16119;Phoebe_bournei_newGene_7934
Cellular Processes	Transport and catabolism	Phagosome	3	Maker00036072.gene;Maker00050186.gene;Phoebe_bournei_newGene_10982
Metabolism	Metabolism of cofactors and vitamins	Porphyrin and chlorophyll metabolism	3	Maker00029288.gene;Maker00043733.gene;Phoebe_bournei_newGene_8066
Metabolism	Lipid metabolism	Glycerolipid metabolism	3	Maker00024705.gene;Maker00041052.gene;Phoebe_bournei_newGene_4846
Metabolism	Metabolism of cofactors and vitamins	Ubiquinone and other terpenoid-quinone biosynthesis	3	Maker00001804.gene;Maker00010733.gene;Phoebe_bournei_newGene_5861
Metabolism	Nucleotide metabolism	Pyrimidine metabolism	3	Maker00003897.gene;Maker00027913.gene;Maker00040103.gene
Metabolism	Carbohydrate metabolism	Pentose and glucuronate interconversions	3	Maker00029887.gene;Maker00042934.gene;Phoebe_bournei_newGene_4846
Metabolism	Lipid metabolism	Cutin, suberine and wax biosynthesis	3	Maker00003942.gene;Maker00008890.gene;Maker00055239.gene
Metabolism	Energy metabolism	Carbon fixation in photosynthetic organisms	3	Maker00018021.gene;Maker00037191.gene;Maker00054745.gene
Genetic Information Processing	Folding, sorting and degradation	RNA degradation	3	Maker00002565.gene;Maker00027466.gene;Maker00036635.gene
Metabolism	Amino acid metabolism	Cysteine and methionine metabolism	3	Maker00015426.gene;Maker00018021.gene;Maker00033507.gene
Metabolism	Metabolism of cofactors and vitamins	Nicotinate and nicotinamide metabolism	3	Maker00005448.gene;Maker00007516.gene;Maker00027913.gene
Metabolism	Carbohydrate metabolism	Fructose and mannose metabolism	3	Maker00021774.gene;Maker00037191.gene;Maker00054745.gene
Genetic Information Processing	Folding, sorting and degradation	SNARE interactions in vesicular transport	3	Maker00025934.gene;Maker00027889.gene;Maker00035574.gene
Genetic Information Processing	Transcription	Spliceosome	3	Maker00016025.gene;Maker00017827.gene;Maker00039996.gene
Genetic Information Processing	Replication and repair	Homologous recombination	3	Maker00020846.gene;Maker00052765.gene;Phoebe_bournei_newGene_11142
Metabolism	Metabolism of terpenoids and polyketides	Carotenoid biosynthesis	2	Maker00031262.gene;Maker00044878.gene
Metabolism	Metabolism of cofactors and vitamins	One carbon pool by folate	2	Maker00024577.gene;Maker00042378.gene
Genetic Information Processing	Replication and repair	Base excision repair	2	Maker00001366.gene;Maker00020666.gene
Genetic Information Processing	Folding, sorting and degradation	Protein export	2	Maker00036790.gene;Maker00050186.gene
Metabolism	Amino acid metabolism	Alanine, aspartate and glutamate metabolism	2	Maker00003905.gene;Maker00038378.gene
Metabolism	Glycan biosynthesis and metabolism	Various types of N-glycan biosynthesis	2	Maker00025857.gene;Maker00046891.gene
Metabolism	Amino acid metabolism	Arginine biosynthesis	2	Maker00003905.gene;Maker00038378.gene
Metabolism	Lipid metabolism	alpha-Linolenic acid metabolism	2	Maker00020102.gene;Phoebe_bournei_newGene_9925
Metabolism	Metabolism of other amino acids	Selenocompound metabolism	2	Maker00031120.gene;Maker00041593.gene
Metabolism	Amino acid metabolism	Tyrosine metabolism	2	Maker00010733.gene;Phoebe_bournei_newGene_9925
Cellular Processes	Transport and catabolism	Peroxisome	2	Maker00020102.gene;Maker00055091.gene
Metabolism	Amino acid metabolism	Histidine metabolism	2	Maker00027894.gene;Maker00051376.gene
Metabolism	Lipid metabolism	Fatty acid biosynthesis	2	Maker00002125.gene;Maker00040930.gene
Metabolism	Lipid metabolism	Glycerophospholipid metabolism	2	Maker00024705.gene;Maker00037268.gene
Metabolism	Amino acid metabolism	Arginine and proline metabolism	2	Maker00002627.gene;Maker00020873.gene
Metabolism	Biosynthesis of other secondary metabolites	Monobactam biosynthesis	2	Maker00031120.gene;Maker00041593.gene
Metabolism	Carbohydrate metabolism	Pyruvate metabolism	2	Maker00018021.gene;Maker00056471.gene
Metabolism	Lipid metabolism	Fatty acid degradation	2	Maker00020102.gene;Phoebe_bournei_newGene_9925
Genetic Information Processing	Translation	Ribosome	2	Maker00043943.gene;Phoebe_bournei_newGene_734
Environmental Information Processing	Signal transduction	Phosphatidylinositol signaling system	2	Maker00024705.gene;Maker00054790.gene
Metabolism	Carbohydrate metabolism	Ascorbate and aldarate metabolism	2	Maker00015499.gene;Phoebe_bournei_newGene_6855
Metabolism	Amino acid metabolism	Phenylalanine metabolism	2	Maker00010733.gene;Maker00020691.gene
Metabolism	Metabolism of terpenoids and polyketides	Zeatin biosynthesis	2	Maker00025710.gene;Maker00026960.gene
Metabolism	Amino acid metabolism	Lysine degradation	2	Maker00013670.gene;Maker00015370.gene
Metabolism	Metabolism of terpenoids and polyketides	Diterpenoid biosynthesis	2	Maker00002576.gene;Maker00036780.gene
Metabolism	Biosynthesis of other secondary metabolites	Isoflavonoid biosynthesis	2	Phoebe_bournei_newGene_802;Phoebe_bournei_newGene_805
Metabolism	Carbohydrate metabolism	Butanoate metabolism	1	Maker00020691.gene
Organismal Systems	Environmental adaptation	Circadian rhythm - plant	1	Maker00008419.gene
Metabolism	Amino acid metabolism	Valine, leucine and isoleucine degradation	1	Maker00034337.gene
Metabolism	Metabolism of other amino acids	Taurine and hypotaurine metabolism	1	Phoebe_bournei_newGene_3248
Genetic Information Processing	Transcription	Basal transcription factors	1	Maker00013353.gene
Metabolism	Amino acid metabolism	Tryptophan metabolism	1	Maker00044610.gene
Metabolism	Metabolism of cofactors and vitamins	Biotin metabolism	1	Maker00039644.gene
Metabolism	Metabolism of cofactors and vitamins	Thiamine metabolism	1	Maker00048040.gene
Metabolism	Lipid metabolism	Fatty acid elongation	1	Maker00040927.gene
Genetic Information Processing	Folding, sorting and degradation	Proteasome	1	Maker00018053.gene
Metabolism	Metabolism of other amino acids	beta-Alanine metabolism	1	Maker00020102.gene
Metabolism	Lipid metabolism	Ether lipid metabolism	1	Maker00037268.gene
Metabolism	Metabolism of cofactors and vitamins	Riboflavin metabolism	1	Maker00012881.gene
Metabolism	Metabolism of terpenoids and polyketides	Terpenoid backbone biosynthesis	1	Maker00029288.gene
Metabolism	Carbohydrate metabolism	Propanoate metabolism	1	Maker00020102.gene
Genetic Information Processing	Translation	mRNA surveillance pathway	1	Maker00002565.gene
Metabolism	Metabolism of cofactors and vitamins	Folate biosynthesis	1	Maker00012881.gene
Metabolism	Glycan biosynthesis and metabolism	Glycosphingolipid biosynthesis - lacto and neolacto series	1	Maker00001278.gene
Metabolism	Glycan biosynthesis and metabolism	Glycosphingolipid biosynthesis - globo and isoglobo series	1	Maker00001278.gene
Metabolism	Glycan biosynthesis and metabolism	N-Glycan biosynthesis	1	Maker00046891.gene
Genetic Information Processing	Replication and repair	DNA replication	1	Phoebe_bournei_newGene_13444
Genetic Information Processing	Replication and repair	Nucleotide excision repair	1	Maker00013353.gene
Metabolism	Biosynthesis of other secondary metabolites	Betalain biosynthesis	1	Maker00026107.gene
Metabolism	Energy metabolism	Nitrogen metabolism	1	Maker00003905.gene
Metabolism	Biosynthesis of other secondary metabolites	Tropane, piperidine and pyridine alkaloid biosynthesis	1	Maker00010733.gene
Metabolism	Carbohydrate metabolism	Citrate cycle (TCA cycle)	1	Maker00018021.gene
Metabolism	Lipid metabolism	Arachidonic acid metabolism	1	Phoebe_bournei_newGene_3248

## Sheet: Table S8
Table S8. phenylalanine, flavonoid, isoflavonoid and fatty acid enrichment metabolic pathways statistics
Pathway ID	Pathway	Gene number	Metabolites number
TZ vs. SW1
	Fatty acid metabolism	14	1
	Fatty acid degradation	11	1
	Biosynthesis of unsaturated fatty acids	9	2
	Fatty acid elongation	6	1
	Fatty acid biosynthesis	6	1
	Linoleic acid metabolism	2	3
	Phenylalanine, tyrosine and tryptophan biosynthesis	6	2
	Phenylalanine metabolism	11	3
	Flavonoid biosynthesis	4	9
	Isoflavonoid biosynthesis	2	2
TZ vs. SW2
	Fatty acid metabolism	7	1
	Fatty acid degradation	2	2
	Biosynthesis of unsaturated fatty acids	5	2
	Fatty acid elongation	1	1
	Fatty acid biosynthesis	3	1
	Phenylpropanoid biosynthesis	9	3
	Phenylalanine metabolism	2	4
	Isoflavonoid biosynthesis	2	2

## Sheet: Table S9
Table S9. List of TFs with metabolites correlation in phenylpropanoid biosynthesis (PCC ˃= 0.8/=˂ -0.8)
geneName	TF families	metaboliteName	PCC	P value
Maker00010232.gene	bHLH	Spermidine	-0.82	0
Maker00022175.gene	TUB	Spermidine	-0.85	0
Maker00024271.gene	HSF	Spermidine	-0.89	0
Maker00030265.gene	C2H2	Spermidine	-0.83	0
Maker00033433.gene	MYB	Spermidine	0.84	0
Maker00035743.gene	NAC	Spermidine	-0.86	0
Phoebe_bournei_newGene_15068	FAR1	Spermidine	-0.8	0
Phoebe_bournei_newGene_15277	bHLH	Spermidine	0.81	0
Maker00017510.gene	AP2/ERF-ERF	3-Dehydroshikimate	0.8	0
Maker00000780.gene	WRKY	L-Tryptophan	-0.9	0
Maker00021384.gene	EIL	L-Tryptophan	-0.85	0
Maker00048027.gene	HB-other	L-Tryptophan	0.81	0
Phoebe_bournei_newGene_8278	GARP-G2-like	L-Tryptophan	-0.91	0
Maker00001762.gene	bHLH	BiochaninA	-0.8	0
Maker00009730.gene	C2C2-GATA	BiochaninA	-0.82	0
Maker00015411.gene	GRAS	BiochaninA	-0.82	0
Maker00031138.gene	GRAS	BiochaninA	-0.82	0
Maker00036741.gene	C2C2-Dof	BiochaninA	-0.82	0
Maker00015513.gene	WRKY	Chavicol	0.85	0
Maker00020935.gene	C2H2	Chavicol	0.8	0
Maker00042857.gene	HB-HD-ZIP	Chavicol	-0.85	0
Maker00031235.gene	BBR-BPC	Sinapylalcohol	-0.83	0
Maker00035628.gene	SBP	Sinapylalcohol	-0.81	0
Maker00000780.gene	WRKY	Protocatechuicacid	0.87	0
Maker00001762.gene	bHLH	Protocatechuicacid	-0.91	0
Maker00009730.gene	C2C2-GATA	Protocatechuicacid	-0.81	0
Maker00014790.gene	MYB	Protocatechuic acid	0.85	0
Maker00015741.gene	C2C2-Dof	Protocatechuicacid	0.82	0
Maker00019810.gene	GRAS	Protocatechuicacid	-0.82	0
Maker00021384.gene	EIL	Protocatechuicacid	0.81	0
Maker00024451.gene	HRT	Protocatechuicacid	-0.82	0
Maker00028131.gene	MYB	Protocatechuic acid	-0.81	0
Maker00036741.gene	C2C2-Dof	Protocatechuicacid	-0.81	0
Maker00042434.gene	zf-HD	Protocatechuicacid	-0.82	0
Phoebe_bournei_newGene_13264	MYB	Protocatechuic acid	-0.9	0
Phoebe_bournei_newGene_13448	TUB	Protocatechuicacid	-0.82	0
Phoebe_bournei_newGene_6773	MYB-related	Protocatechuicacid	-0.81	0
Phoebe_bournei_newGene_8278	GARP-G2-like	Protocatechuicacid	0.85	0
Maker00001465.gene	WRKY	Genistein	-0.83	0
Maker00014790.gene	MYB	Genistein	0.83	0
Maker00019810.gene	GRAS	Genistein	-0.85	0
Maker00028131.gene	MYB	Genistein	-0.85	0
Maker00035628.gene	SBP	Genistein	-0.87	0
Maker00052800.gene	HB-other	Genistein	-0.83	0
Maker00012962.gene	bHLH	Salicylicacid	-0.83	0
Maker00013456.gene	MYB-related	Salicylicacid	0.8	0
Maker00035533.gene	HB-BELL	Salicylicacid	-0.81	0
Maker00047598.gene	HB-HD-ZIP	Salicylicacid	-0.8	0
Maker00052819.gene	MYB	Salicylic acid	0.8	0
Maker00056077.gene	bHLH	Salicylicacid	-0.81	0
Phoebe_bournei_newGene_13264	MYB	Salicylic acid	-0.81	0
Phoebe_bournei_newGene_13448	TUB	Salicylicacid	-0.8	0
Maker00001762.gene	bHLH	2-Pyrocatechuicacid	-0.8	0
Maker00035628.gene	SBP	2-Pyrocatechuicacid	-0.81	0

## Sheet: Table S10
Table S10. List of TFs with metabolites correlation in flavonoid biosynthesis (PCC ˃= 0.8/=˂ -0.8)
geneName	TF families	metaboliteName	PCC	P value
Maker00001465.gene	WRKY	Leucocyanidin	0.87	0
Maker00001762.gene	bHLH	Leucocyanidin	0.94	0
Maker00003884.gene	GRAS	Leucocyanidin	0.81	0
Maker00009730.gene	C2C2-GATA	Leucocyanidin	0.82	0
Maker00010141.gene	HB-BELL	Leucocyanidin	0.85	0
Maker00014790.gene	MYB	Leucocyanidin	-0.88	0
Maker00015741.gene	C2C2-Dof	Leucocyanidin	-0.8	0
Maker00016025.gene	WRKY	Leucocyanidin	-0.81	0
Maker00019810.gene	GRAS	Leucocyanidin	0.83	0
Maker00021384.gene	EIL	Leucocyanidin	-0.8	0
Maker00024451.gene	HRT	Leucocyanidin	0.87	0
Maker00028131.gene	MYB	Leucocyanidin	0.87	0
Maker00029745.gene	bHLH	Leucocyanidin	0.88	0
Maker00031138.gene	GRAS	Leucocyanidin	0.81	0
Maker00031428.gene	C2H2	Leucocyanidin	0.82	0
Maker00033119.gene	LOB	Leucocyanidin	-0.82	0
Maker00035628.gene	SBP	Leucocyanidin	0.85	0
Maker00036741.gene	C2C2-Dof	Leucocyanidin	0.84	0
Maker00037191.gene	C3H	Leucocyanidin	0.89	0
Maker00037335.gene	HSF	Leucocyanidin	0.84	0
Maker00042434.gene	zf-HD	Leucocyanidin	0.82	0
Maker00047501.gene	C2C2-GATA	Leucocyanidin	-0.85	0
Maker00048027.gene	HB-other	Leucocyanidin	0.82	0
Maker00052800.gene	HB-other	Leucocyanidin	0.87	0
Phoebe_bournei_newGene_13448	TUB	Leucocyanidin	0.82	0
Phoebe_bournei_newGene_17495	bHLH	Leucocyanidin	0.85	0
Phoebe_bournei_newGene_6773	MYB-related	Leucocyanidin	0.86	0
Phoebe_bournei_newGene_8278	GARP-G2-like	Leucocyanidin	-0.82	0
Phoebe_bournei_newGene_9819	bHLH	Leucocyanidin	0.83	0
Maker00000780.gene	WRKY	Naringin	-0.85	0
Maker00015741.gene	C2C2-Dof	Naringin	-0.87	0
Maker00023527.gene	C2H2	Naringin	-0.8	0
Maker00027671.gene	bZIP	Naringin	0.83	0
Maker00049204.gene	MADS-M-type	Naringin	0.91	0
Phoebe_bournei_newGene_8278	GARP-G2-like	Naringin	-0.81	0
Maker00001465.gene	WRKY	Luteolin	-0.82	0
Maker00014790.gene	MYB	Luteolin	0.8	0
Maker00019810.gene	GRAS	Luteolin	-0.83	0
Maker00028131.gene	MYB	Luteolin	-0.8	0
Maker00035628.gene	SBP	Luteolin	-0.82	0
Maker00052800.gene	HB-other	Luteolin	-0.84	0
Phoebe_bournei_newGene_12873	C2C2-LSD	Luteolin	-0.84	0
Maker00000780.gene	WRKY	Eriodictyol	0.82	0
Maker00019810.gene	GRAS	Eriodictyol	-0.8	0
Maker00052495.gene	C2C2-Dof	Eriodictyol	0.8	0
Phoebe_bournei_newGene_12873	C2C2-LSD	Eriodictyol	-0.82	0
Maker00001465.gene	WRKY	Quercetin	-0.89	0
Maker00014790.gene	MYB	Quercetin	0.84	0
Maker00019810.gene	GRAS	Quercetin	-0.86	0
Maker00028131.gene	MYB	Quercetin	-0.84	0
Maker00033644.gene	HB-HD-ZIP	Quercetin	0.8	0
Maker00035628.gene	SBP	Quercetin	-0.82	0
Maker00048027.gene	HB-other	Quercetin	-0.8	0
Maker00049376.gene	OFP	Quercetin	-0.82	0
Maker00052800.gene	HB-other	Quercetin	-0.88	0
Maker00054343.gene	HB-BELL	Quercetin	-0.87	0
Phoebe_bournei_newGene_12873	C2C2-LSD	Quercetin	-0.82	0
Phoebe_bournei_newGene_1565	C2C2-Dof	Quercetin	-0.81	0
Maker00000780.gene	WRKY	Hesperetin	0.8	0
Maker00015513.gene	WRKY	Hesperetin	0.87	0
Maker00025976.gene	C2C2-Dof	Hesperetin	-0.8	0
Maker00042857.gene	HB-HD-ZIP	Hesperetin	-0.83	0
Maker00052819.gene	MYB	Hesperetin	0.82	0
Maker00000780.gene	WRKY	Taxifolin	0.84	0
Maker00001465.gene	WRKY	Taxifolin	-0.84	0
Maker00003997.gene	C2H2	Taxifolin	-0.81	0
Maker00013113.gene	bZIP	Taxifolin	0.83	0
Maker00014790.gene	MYB	Taxifolin	0.85	0
Maker00015741.gene	C2C2-Dof	Taxifolin	0.86	0
Maker00019810.gene	GRAS	Taxifolin	-0.88	0
Maker00028131.gene	MYB	Taxifolin	-0.83	0
Maker00033644.gene	HB-HD-ZIP	Taxifolin	0.83	0
Maker00042434.gene	zf-HD	Taxifolin	-0.82	0
Maker00047598.gene	HB-HD-ZIP	Taxifolin	-0.86	0
Maker00052800.gene	HB-other	Taxifolin	-0.84	0
Phoebe_bournei_newGene_17495	bHLH	Taxifolin	-0.82	0
Phoebe_bournei_newGene_7553	bHLH	Taxifolin	-0.83	0
Maker00000780.gene	WRKY	Myricetin	0.82	0
Maker00001465.gene	WRKY	Myricetin	-0.85	0
Maker00002104.gene	MADS-MIKC	Myricetin	-0.8	0
Maker00004321.gene	MYB-related	Myricetin	0.84	0
Maker00009559.gene	WRKY	Myricetin	0.8	0
Maker00014790.gene	MYB	Myricetin	0.84	0
Maker00015413.gene	LOB	Myricetin	0.82	0
Maker00015741.gene	C2C2-Dof	Myricetin	0.82	0
Maker00019810.gene	GRAS	Myricetin	-0.81	0
Maker00021384.gene	EIL	Myricetin	0.87	0
Maker00025976.gene	C2C2-Dof	Myricetin	-0.81	0
Maker00028131.gene	MYB	Myricetin	-0.81	0
Maker00033644.gene	HB-HD-ZIP	Myricetin	0.83	0
Maker00035420.gene	MYB	Myricetin	0.82	0
Maker00037191.gene	C3H	Myricetin	-0.83	0
Maker00039458.gene	bZIP	Myricetin	0.82	0
Maker00045608.gene	WRKY	Myricetin	0.81	0
Maker00048027.gene	HB-other	Myricetin	-0.85	0
Maker00048541.gene	B3-ARF	Myricetin	-0.82	0
Maker00051627.gene	NAC	Myricetin	0.84	0
Maker00052495.gene	C2C2-Dof	Myricetin	0.82	0
Maker00052536.gene	MYB-related	Myricetin	-0.84	0
Maker00052800.gene	HB-other	Myricetin	-0.89	0
Maker00054343.gene	HB-BELL	Myricetin	-0.81	0
Maker00056383.gene	MYB	Myricetin	0.83	0
Phoebe_bournei_newGene_1097	NF-YB	Myricetin	0.87	0
Phoebe_bournei_newGene_12873	C2C2-LSD	Myricetin	-0.89	0
Phoebe_bournei_newGene_8278	GARP-G2-like	Myricetin	0.8	0
Phoebe_bournei_newGene_9819	bHLH	Myricetin	-0.8	0
Maker00009730.gene	C2C2-GATA	Eriodictyolchalcone	-0.8	0
Maker00014644.gene	NF-YA	Eriodictyolchalcone	0.85	0
Maker00015513.gene	WRKY	Eriodictyolchalcone	0.85	0
Maker00015741.gene	C2C2-Dof	Eriodictyolchalcone	0.81	0
Maker00027671.gene	bZIP	Eriodictyolchalcone	-0.88	0
Maker00045843.gene	CPP	Eriodictyolchalcone	0.82	0
Maker00049204.gene	MADS-M-type	Eriodictyolchalcone	-0.87	0

[truncated: 1 more sheets: Table S11]
